# Supplementary material for: Genetic Analysis of Genomic and Methylomic Variation and Construction of Multi-Trait Mutant Library in Rice Carried on Chang'e-5
Source: Research Square preprint supplement (doi:10.21203/rs.3.rs-8781482/v1), 2026-02-13
Supplement: Supplementary file 1 [file 4b427bbb93cd26c9bbecc763.xlsx]

## Sheet: Sheet1
Table S2. Information of 277 mutants.
Mutant number	Mutated trait
K1	Drought tolerance
K2	Drought tolerance
K3	Drought tolerance
K4	Drought tolerance
K5	Drought tolerance
K6	Drought tolerance
K7	Drought tolerance
K8	Drought tolerance
K9	Drought tolerance
K10	Drought tolerance
K11	Drought tolerance
K12	Drought tolerance
K13	Drought tolerance
K14	Drought tolerance
K15	Drought tolerance
K16	Drought tolerance
K17	Drought tolerance
K18	Drought tolerance
K19	Drought tolerance
K20	Drought tolerance
K21	Drought tolerance
K22	Drought tolerance
K23	Drought tolerance
K24	Drought tolerance
K25	Drought tolerance
K26	Drought tolerance
K27	Drought tolerance
K28	Drought tolerance
K29	Drought tolerance
K30	Drought tolerance
K31	Drought tolerance
K32	Drought tolerance
K33	Salt tolerance
K34	Salt tolerance
K35	Salt tolerance
K36	Salt tolerance
K37	Salt tolerance
K38	Salt tolerance
K39	Salt tolerance
K40	Grain type
K41	Grain type
K42	Grain type
K43	Grain type
K44	Grain type
K45	Grain type
K46	Grain type
K47	Grain type
K48	Grain type
K49	Grain type
K50	Grain type
K51	Grain type
K52	Grain type
K53	Grain type
K54	Grain type
K55	Grain type
K56	Grain type
K57	Grain type
K58	Grain type
K59	Grain type
K60	Grain type
K61	Grain type
K62	Grain type
K63	Cold tolerance
K64	Cold tolerance
K65	Cold tolerance
K66	Cold tolerance
K67	Cold tolerance
K68	Cold tolerance
K69	Cold tolerance
K70	Cold tolerance
K71	Cold tolerance
K72	Cold tolerance
K73	Cold tolerance
K74	Cold tolerance
K75	Cold tolerance
K76	Cold tolerance
K77	Cold tolerance
K78	Cold tolerance
K79	Cold tolerance
K80	Cold tolerance
K81	Cold tolerance
K82	Cold tolerance
K83	Cold tolerance
K84	Cold tolerance
K85	Cold tolerance
K86	Cold tolerance
K87	Cold tolerance
K88	Cold tolerance
K89	Cold tolerance
K90	Rice blast
K91	Rice blast
K92	Rice blast
K93	Rice blast
K94	Rice blast
K95	Rice blast
K96	Rice blast
K97	Salt tolerance
K98	Salt tolerance
K99	Salt tolerance
K100	Salt tolerance
K101	Salt tolerance
K102	Salt tolerance
K103	Salt tolerance
K104	Salt tolerance
K105	Salt tolerance
K106	Salt tolerance
K107	Nitrogen utilization
K108	Nitrogen utilization
K109	Nitrogen utilization
K110	Nitrogen utilization
K111	Nitrogen utilization
K112	Nitrogen utilization
K113	Nitrogen utilization
K114	Nitrogen utilization
K115	Nitrogen utilization
K116	Nitrogen utilization
K117	Nitrogen utilization
K118	Nitrogen utilization
K119	Nitrogen utilization
K120	Nitrogen utilization
K121	Nitrogen utilization
K122	Nitrogen utilization
K123	Nitrogen utilization
K124	Nitrogen utilization
K125	Nitrogen utilization
K126	Nitrogen utilization
K127	Nitrogen utilization
K128	Nitrogen utilization
K129	Nitrogen utilization
K130	Nitrogen utilization
K131	Nitrogen utilization
K132	Nitrogen utilization
K133	Nitrogen utilization
K134	Nitrogen utilization
K135	Nitrogen utilization
K136	Nitrogen utilization
K137	Nitrogen utilization
K138	Nitrogen utilization
K139	Nitrogen utilization
K140	Nitrogen utilization
K141	Nitrogen utilization
K142	Nitrogen utilization
K143	Nitrogen utilization
K144	Nitrogen utilization
K145	Nitrogen utilization
K146	Nitrogen utilization
K147	Nitrogen utilization
K148	Nitrogen utilization
K149	Nitrogen utilization
K150	Nitrogen utilization
K151	Nitrogen utilization
K152	Nitrogen utilization
K153	Nitrogen utilization
K154	Nitrogen utilization
K155	Nitrogen utilization
K156	Nitrogen utilization
K157	Nitrogen utilization
K158	Nitrogen utilization
K159	Plant height
K160	Plant height
K161	Grain type
K162	Tillering
K163	Plant height, reproductive period
K164	Plant type
K165	Plant height, reproductive period
K166	Fertility
K167	Plant height
K168	Plant height, grain type
K169	Plant height, grain type
K170	Plant height
K171	Fertility
K172	Plant height
K173	Plant height, grain type
K174	Plant height
K175	Plant height
K176	Plant height, fertility
K177	Plant height
K178	Plant height
K179	Plant height, grain type
K180	Plant height
K181	Plant height
K182	Plant height
K183	Plant height
K184	Plant height
K185	Plant type
K186	Plant height, plant type
K187	Plant height, reproductive period
K188	Plant height, reproductive period
K189	Plant height
K190	Reproductive period
K191	Reproductive period
K192	Reproductive period
K193	Grain type
K194	Plant height, reproductive period
K195	Grain type, reproductive period
K196	Plant height, reproductive period
K197	Grain type
K198	Reproductive period
K199	Reproductive period
K200	Plant height
K201	Plant height, reproductive period
K202	Grain type
K203	Grain type
K204	Plant height
K205	Plant height, reproductive period
K206	Reproductive period
K207	Plant height
K208	Plant height, reproductive period
K209	Reproductive period
K210	Plant height, reproductive period
K211	Reproductive period
K212	Reproductive period
K213	Plant height
K214	Plant height
K215	Plant height
K216	Tillering
K217	Leaf vein
K218	Plant height
K219	Tillering
K220	Tillering
K221	Plant height
K222	Grain type
K223	Plant height
K224	Plant height
K225	Tillering
K226	Plant height
K227	Plant height
K228	Tillering
K229	Plant type
K230	Grain type
K231	Plant height
K232	Plant height, plant type
K233	Plant type
K234	Ear
K235	Tillering
K236	Plant height
K237	Plant height
K238	Reproductive period
K239	Plant height
K240	Fertility
K241	Plant height
K242	Reproductive period
K243	Plant height, reproductive period
K244	Reproductive period
K245	Plant height
K246	Plant height
K247	Grain type
K248	Fertility
K249	Plant height, grain type
K250	Grain type
K251	Grain type
K252	Grain type
K253	Plant height
K254	Plant height
K255	Plant height
K256	Leaf, plant height
K257	Grain type
K258	Plant height, reproductive period
K259	Plant height
K260	Plant height, tillering
K261	Plant height, tillering, plant type
K262	Plant height, reproductive period
K263	Grain type, ear
K264	Plant height, ear, bacterial blight
K265	Ear, reproductive period, bacterial blight
K266	Grain type, leaf, bacterial blight
K267	Plant type, bacterial blight
K268	Plant height, reproductive period, ear, bacterial blight
K269	Ear, plant height, bacterial blight
K270	Plant height, reproductive period, bacterial blight
K271	Reproductive period, bacterial blight
K272	Ear, plant type, bacterial blight
K273	Plant height, reproductive period, bacterial blight
K274	Ear, bacterial blight
K275	Ear, bacterial blight
K276	Plant height, reproductive period, bacterial blight
K277	Plant height, bacterial blight
