# Supplementary material for: Genetic Analysis of Genomic and Methylomic Variation and Construction of Multi-Trait Mutant Library in Rice Carried on Chang'e-5
Source: Research Square preprint supplement (doi:10.21203/rs.3.rs-8781482/v1), 2026-02-13
Supplement: Supplementary file 2 [file c9e5161925096e659a366473.xlsx]

## Sheet: Sheet1
Table S1. qRT-PCR Primer Information.
Primer name	Primer sequence
SK1G00044581-F	GGTATGGTTGAGACTAGGATCG
SK1G00044581-R	TTTCAAGCCGTTGTTGTCTAAG
SK1G00052825-F	TTTTGCTGGACTTGGATTTCTG
SK1G00052825-R	CGACGAGTGAAGCAATAAGAAG
SK1G00042488-F	ATTCCGACGAAGTTCGAAAATC
SK1G00042488-R	TGCTTGAAGAACTCGTTTGAAG
SK1G00048986-F	CAATATGGGAAGTGGCATTGAG
SK1G00048986-R	GTTTGTGAATTGCATCCTGAGT
SK1G00051356-F	TTACGCAGAAATTTTGTCTCGG
SK1G00051356-R	GTGTACAAGAACATACAGTGCC
SK1G00061753-F	CTCGTCGTGAAGGTAAAATTCG
SK1G00061753-R	CCAGATTAAGATCAAAGTGCGG
SK1G00048468-F	CGCAGAACTACAAGCTACAATC
SK1G00048468-R	TTCCAAATTACAGGCGATTGTG
SK1G00047179-F	CTTCTGCAACTTCACCAAGGAG
SK1G00047179-R	AATCCTCCACATCCTCCCTATC
SK1G00059434-F	CATCCTCGTGAACAACTTCATG
SK1G00059434-R	CAGCCTGTACTTGAGGTAGTTC
