# Supplementary material for: Genetic Analysis of Genomic and Methylomic Variation and Construction of Multi-Trait Mutant Library in Rice Carried on Chang'e-5
Source: Research Square preprint supplement (doi:10.21203/rs.3.rs-8781482/v1), 2026-02-13
Supplement: Supplementary file 3 [file fe34cfdfc0e2a4d1d7a62682.docx]

**Supplementary Materials 1.**


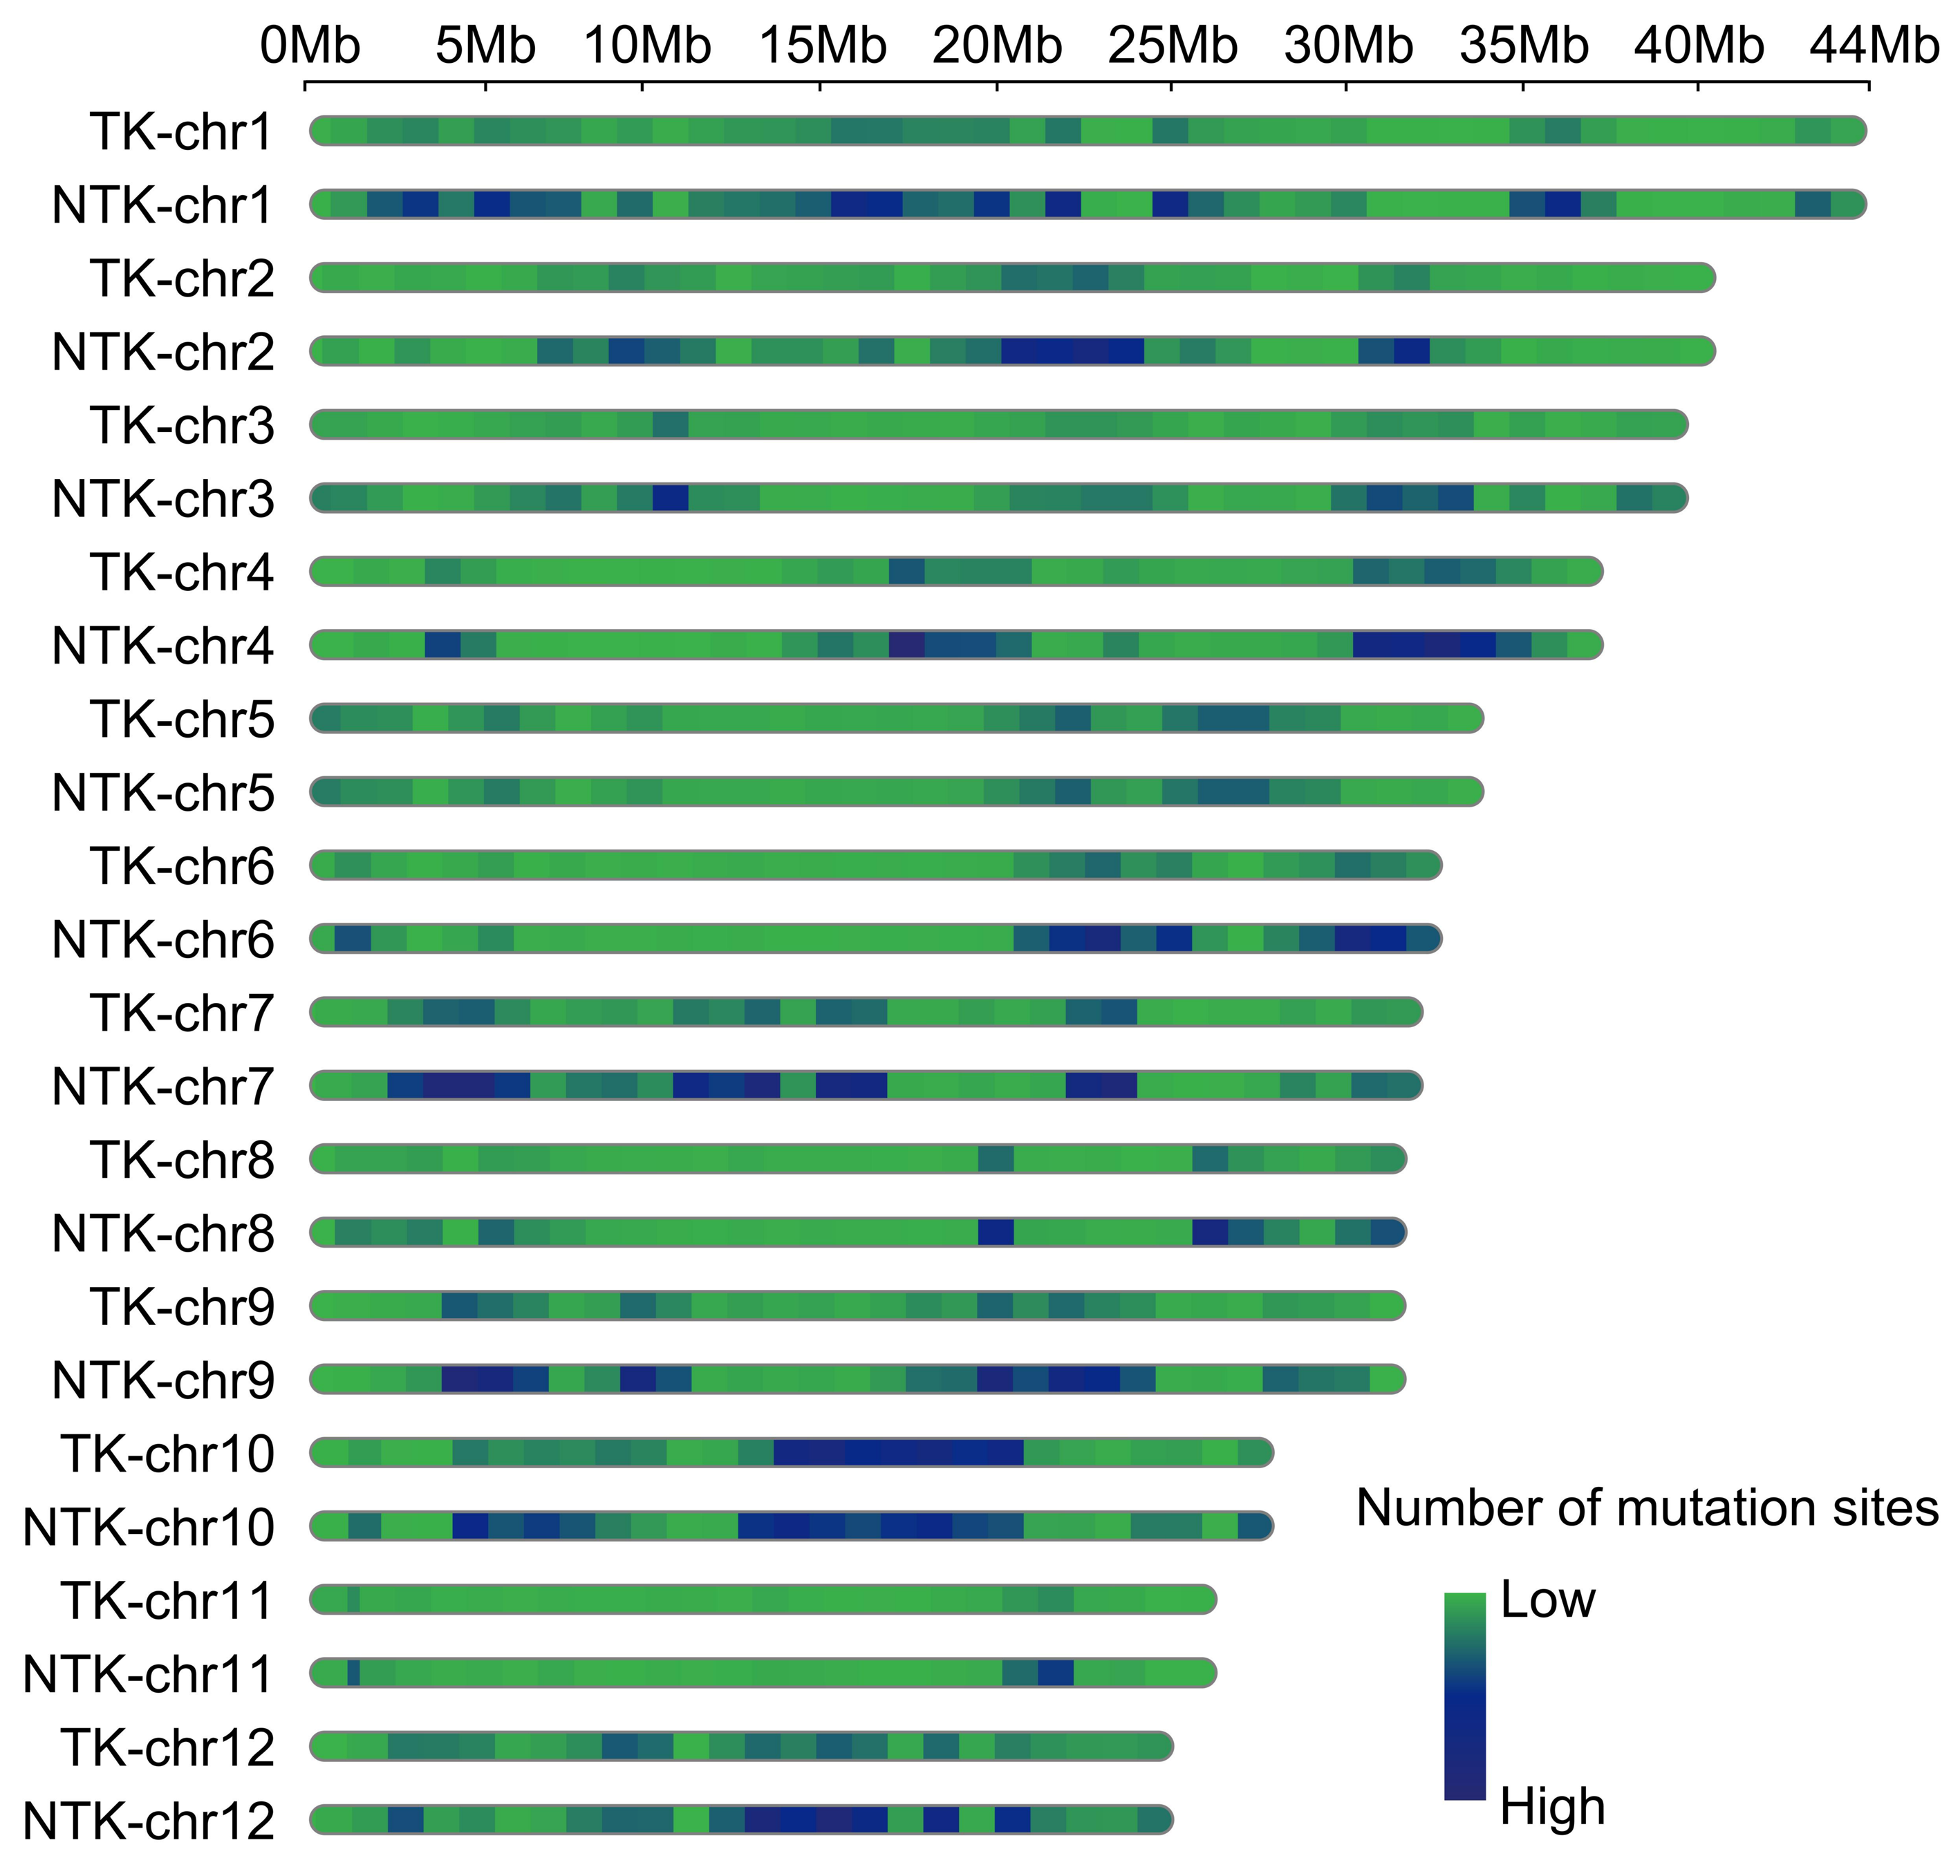


**Fig. S1** **Distribution of TK and NTK genomic variation sites on chromosomes, where the colour represents the number of mutation sites.**


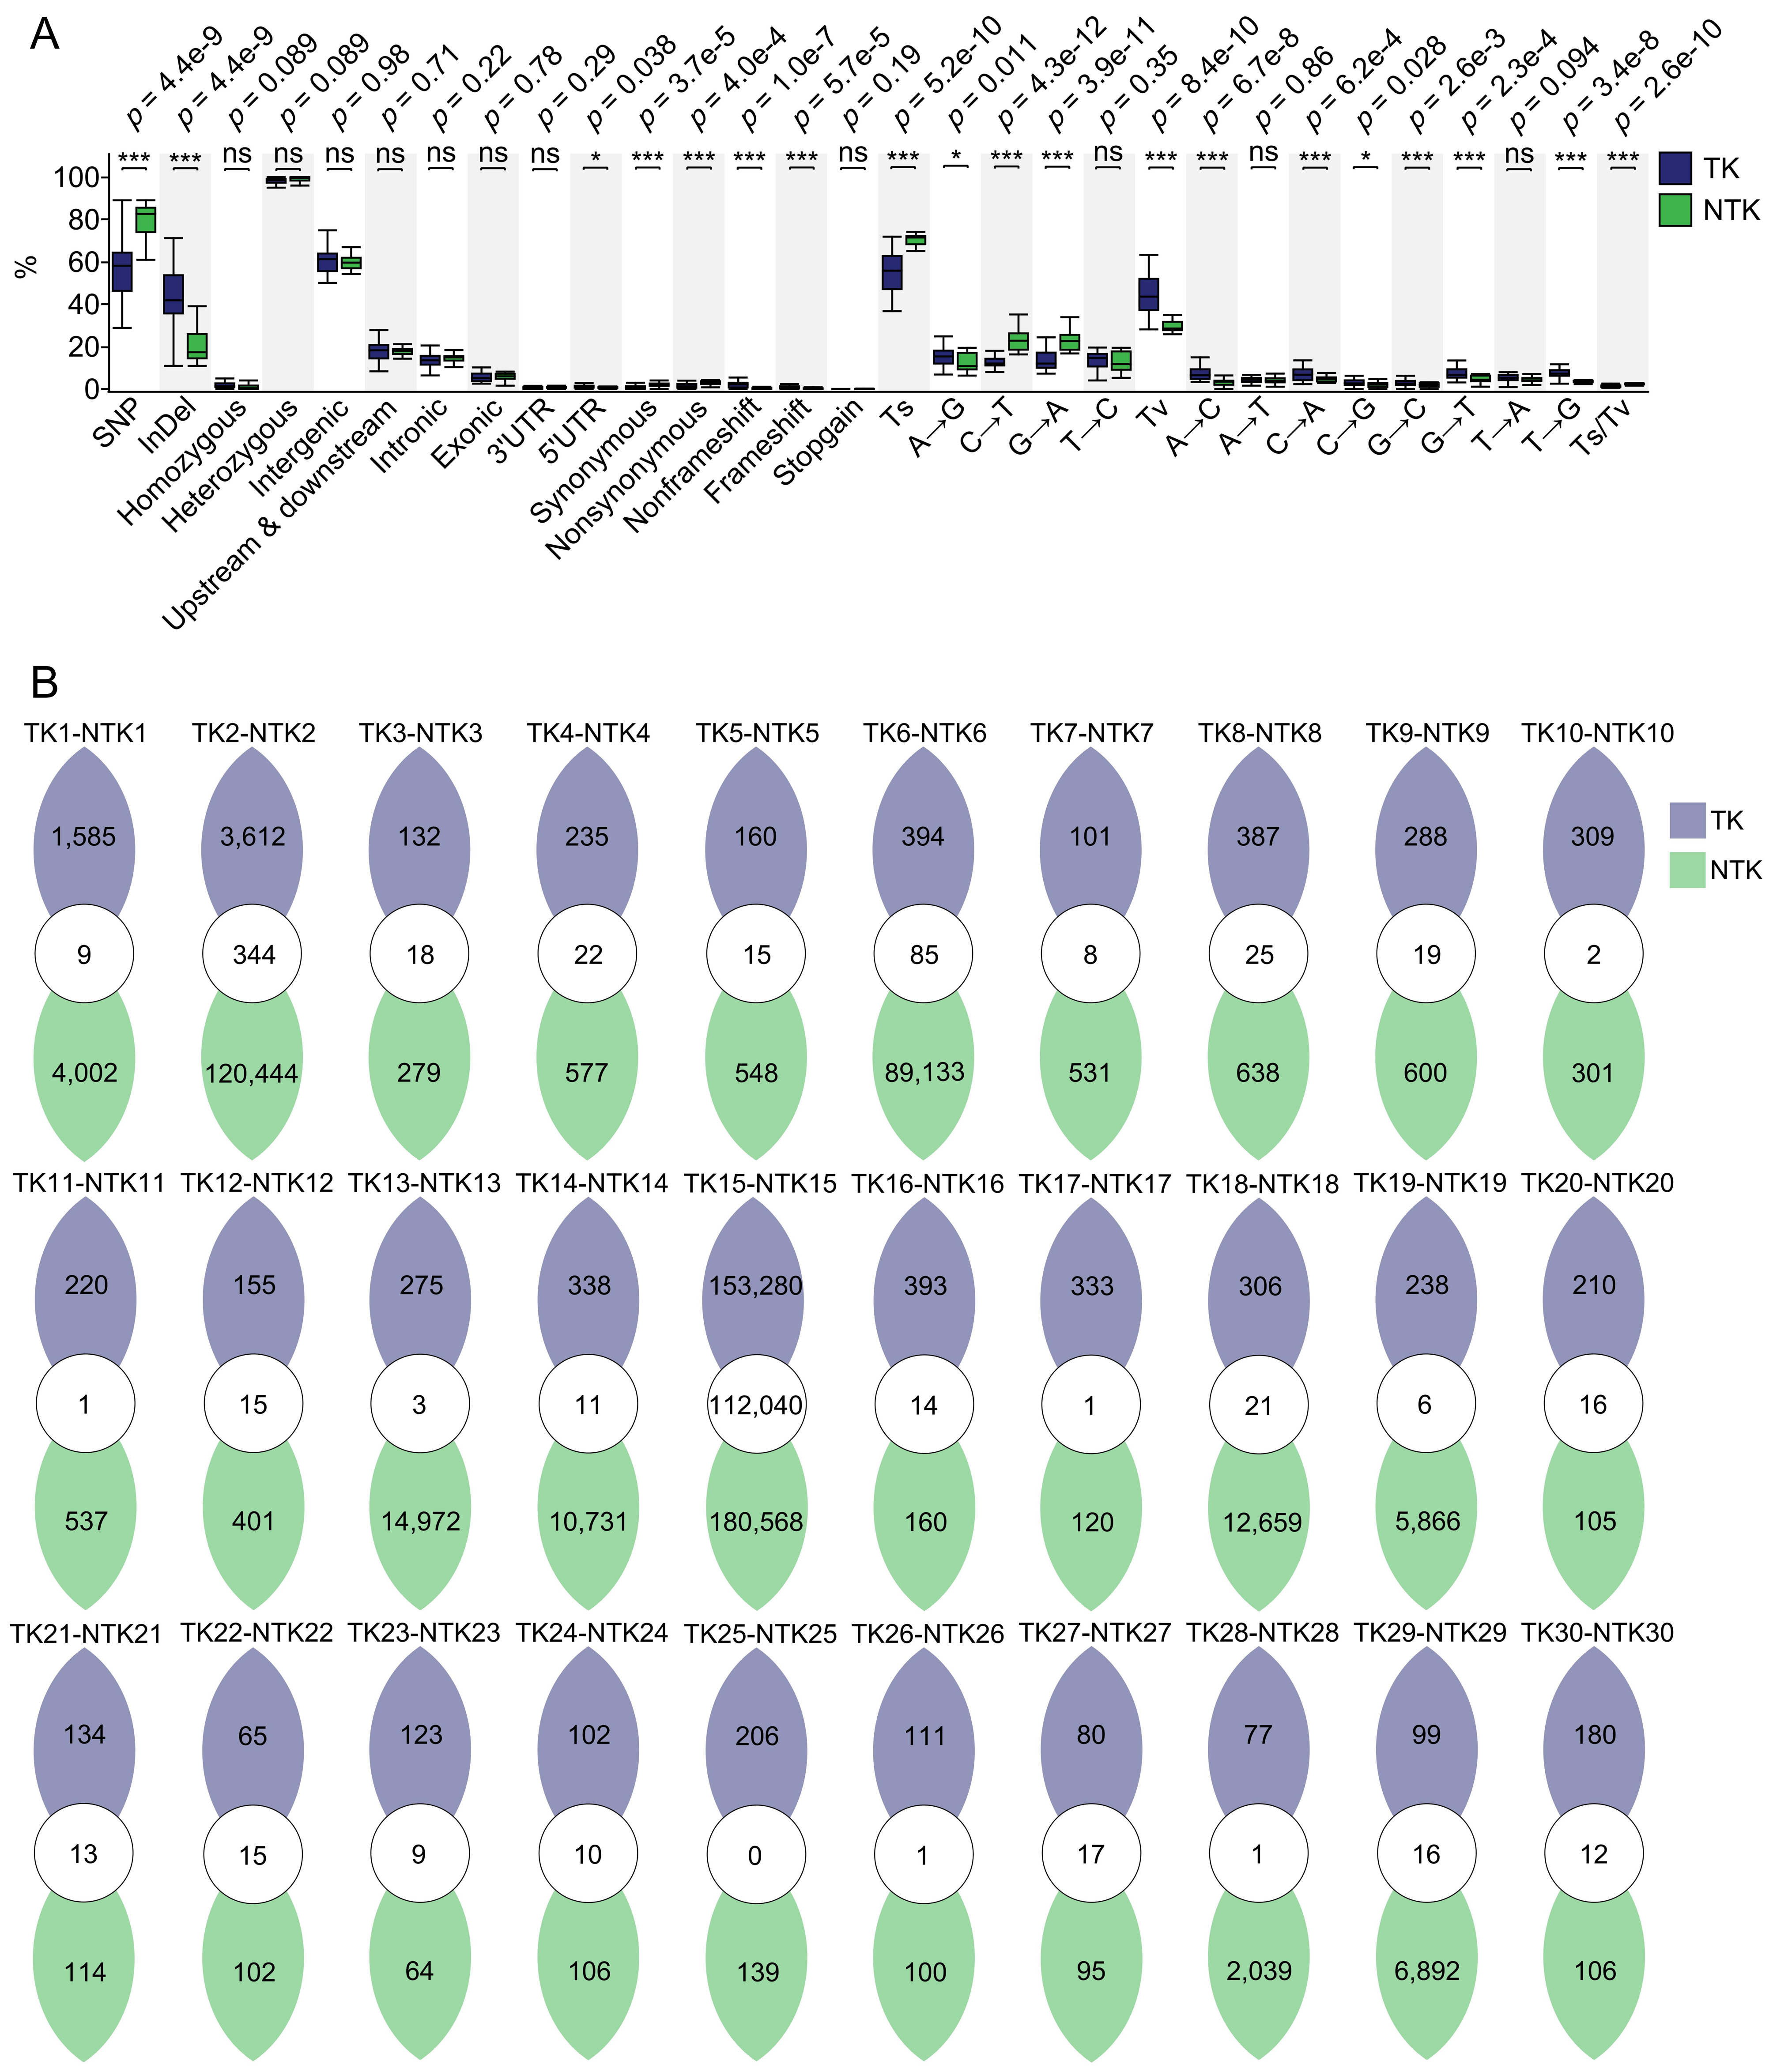


**Fig. S2 Comparison of genomic variation characteristics and number of genetic loci between TK and NTK.** **A** Comparison of genomic variation characteristics between TK and NTK. **B** The number of genetic and nongenetic variant loci in TK and NTK single group samples.


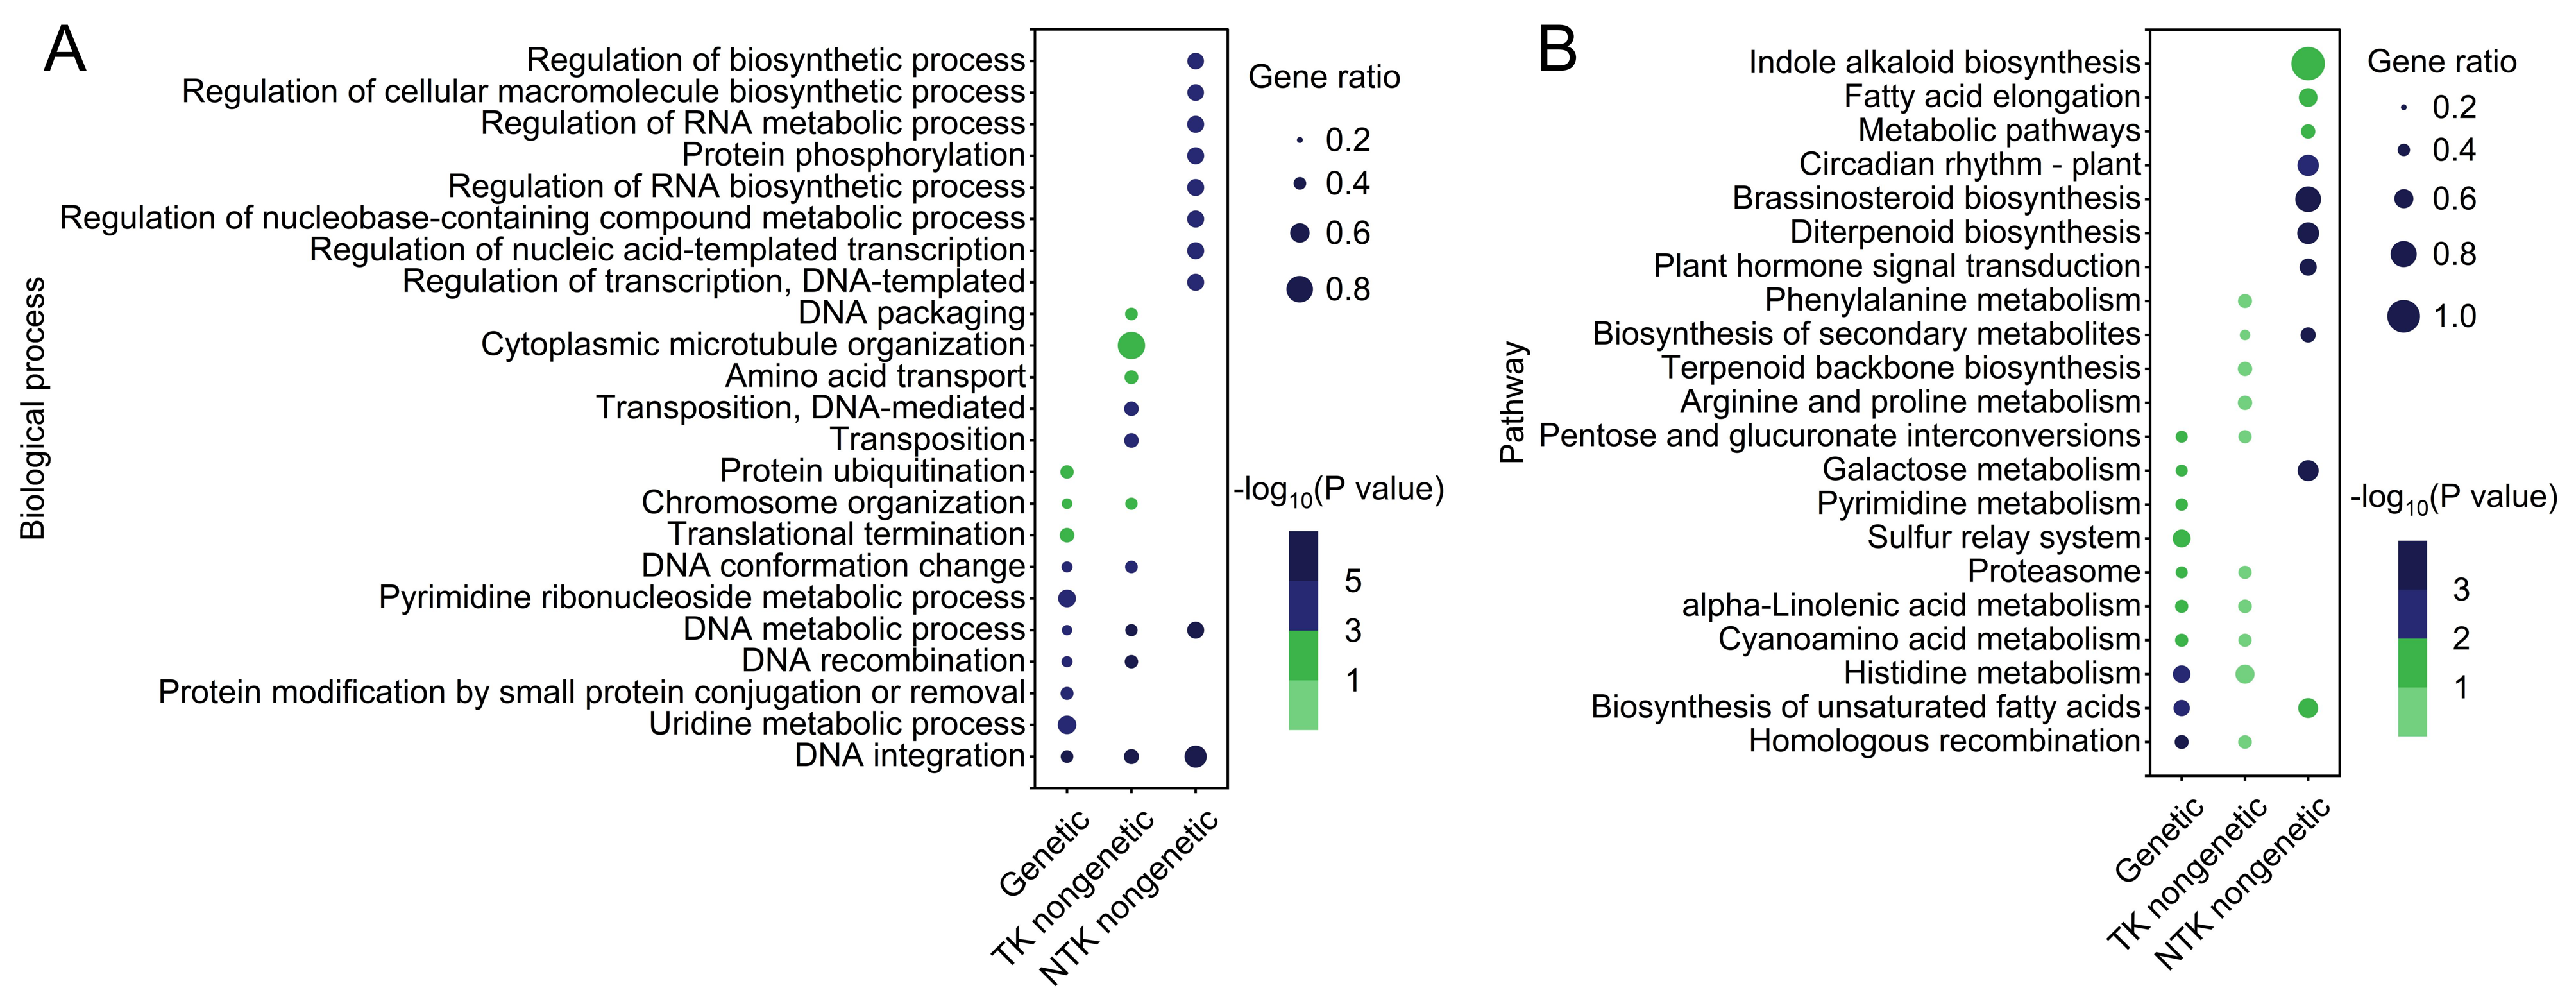


**Fig. S3** **Enrichment analysis of genes containing genetic loci and genes containing nongenetic loci.** **A** GO enrichment with genetic loci and nongenetic loci, selecting the top 10 biological processes with the highest significance, where the circle size represents the ratio of target genes enriched in the biological process to background genes enriched in the biological process, and the colour represents the significance level. **B** Enrichment of KEGG genes containing genetic loci and genes containing nongenetic loci, selecting the top 10 pathways with the highest significance, where the circle size represents the ratio of target genes enriched in the pathway to background genes enriched in the pathway, and the colour represents the significance level.


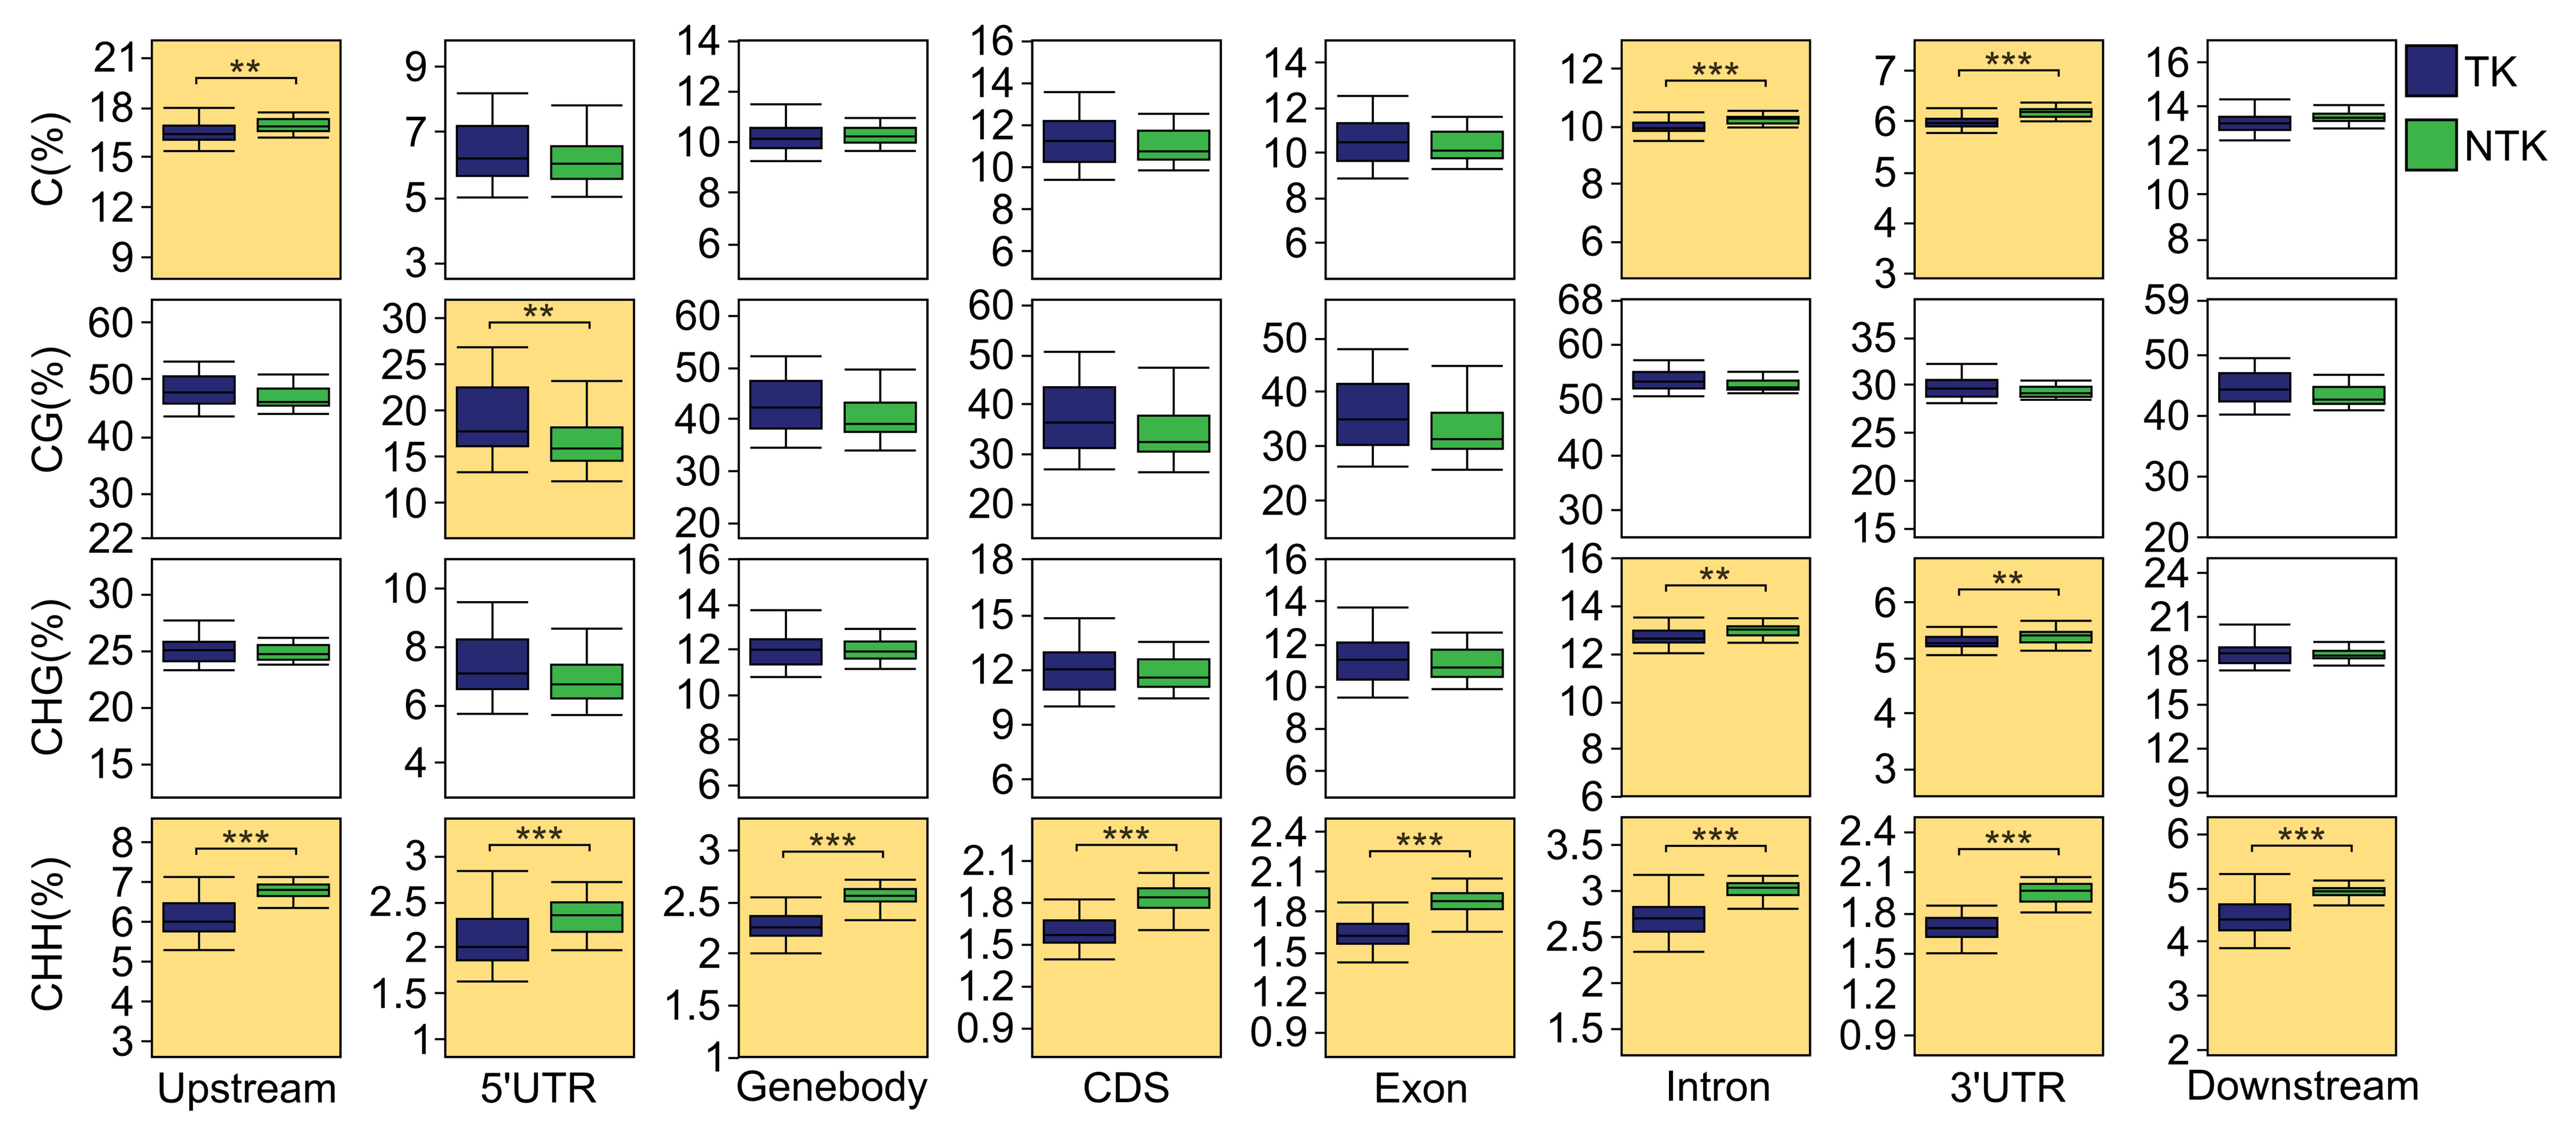


**Fig. S4 Comparison of methylation rates of TK and NTK methylation types on the genome.**


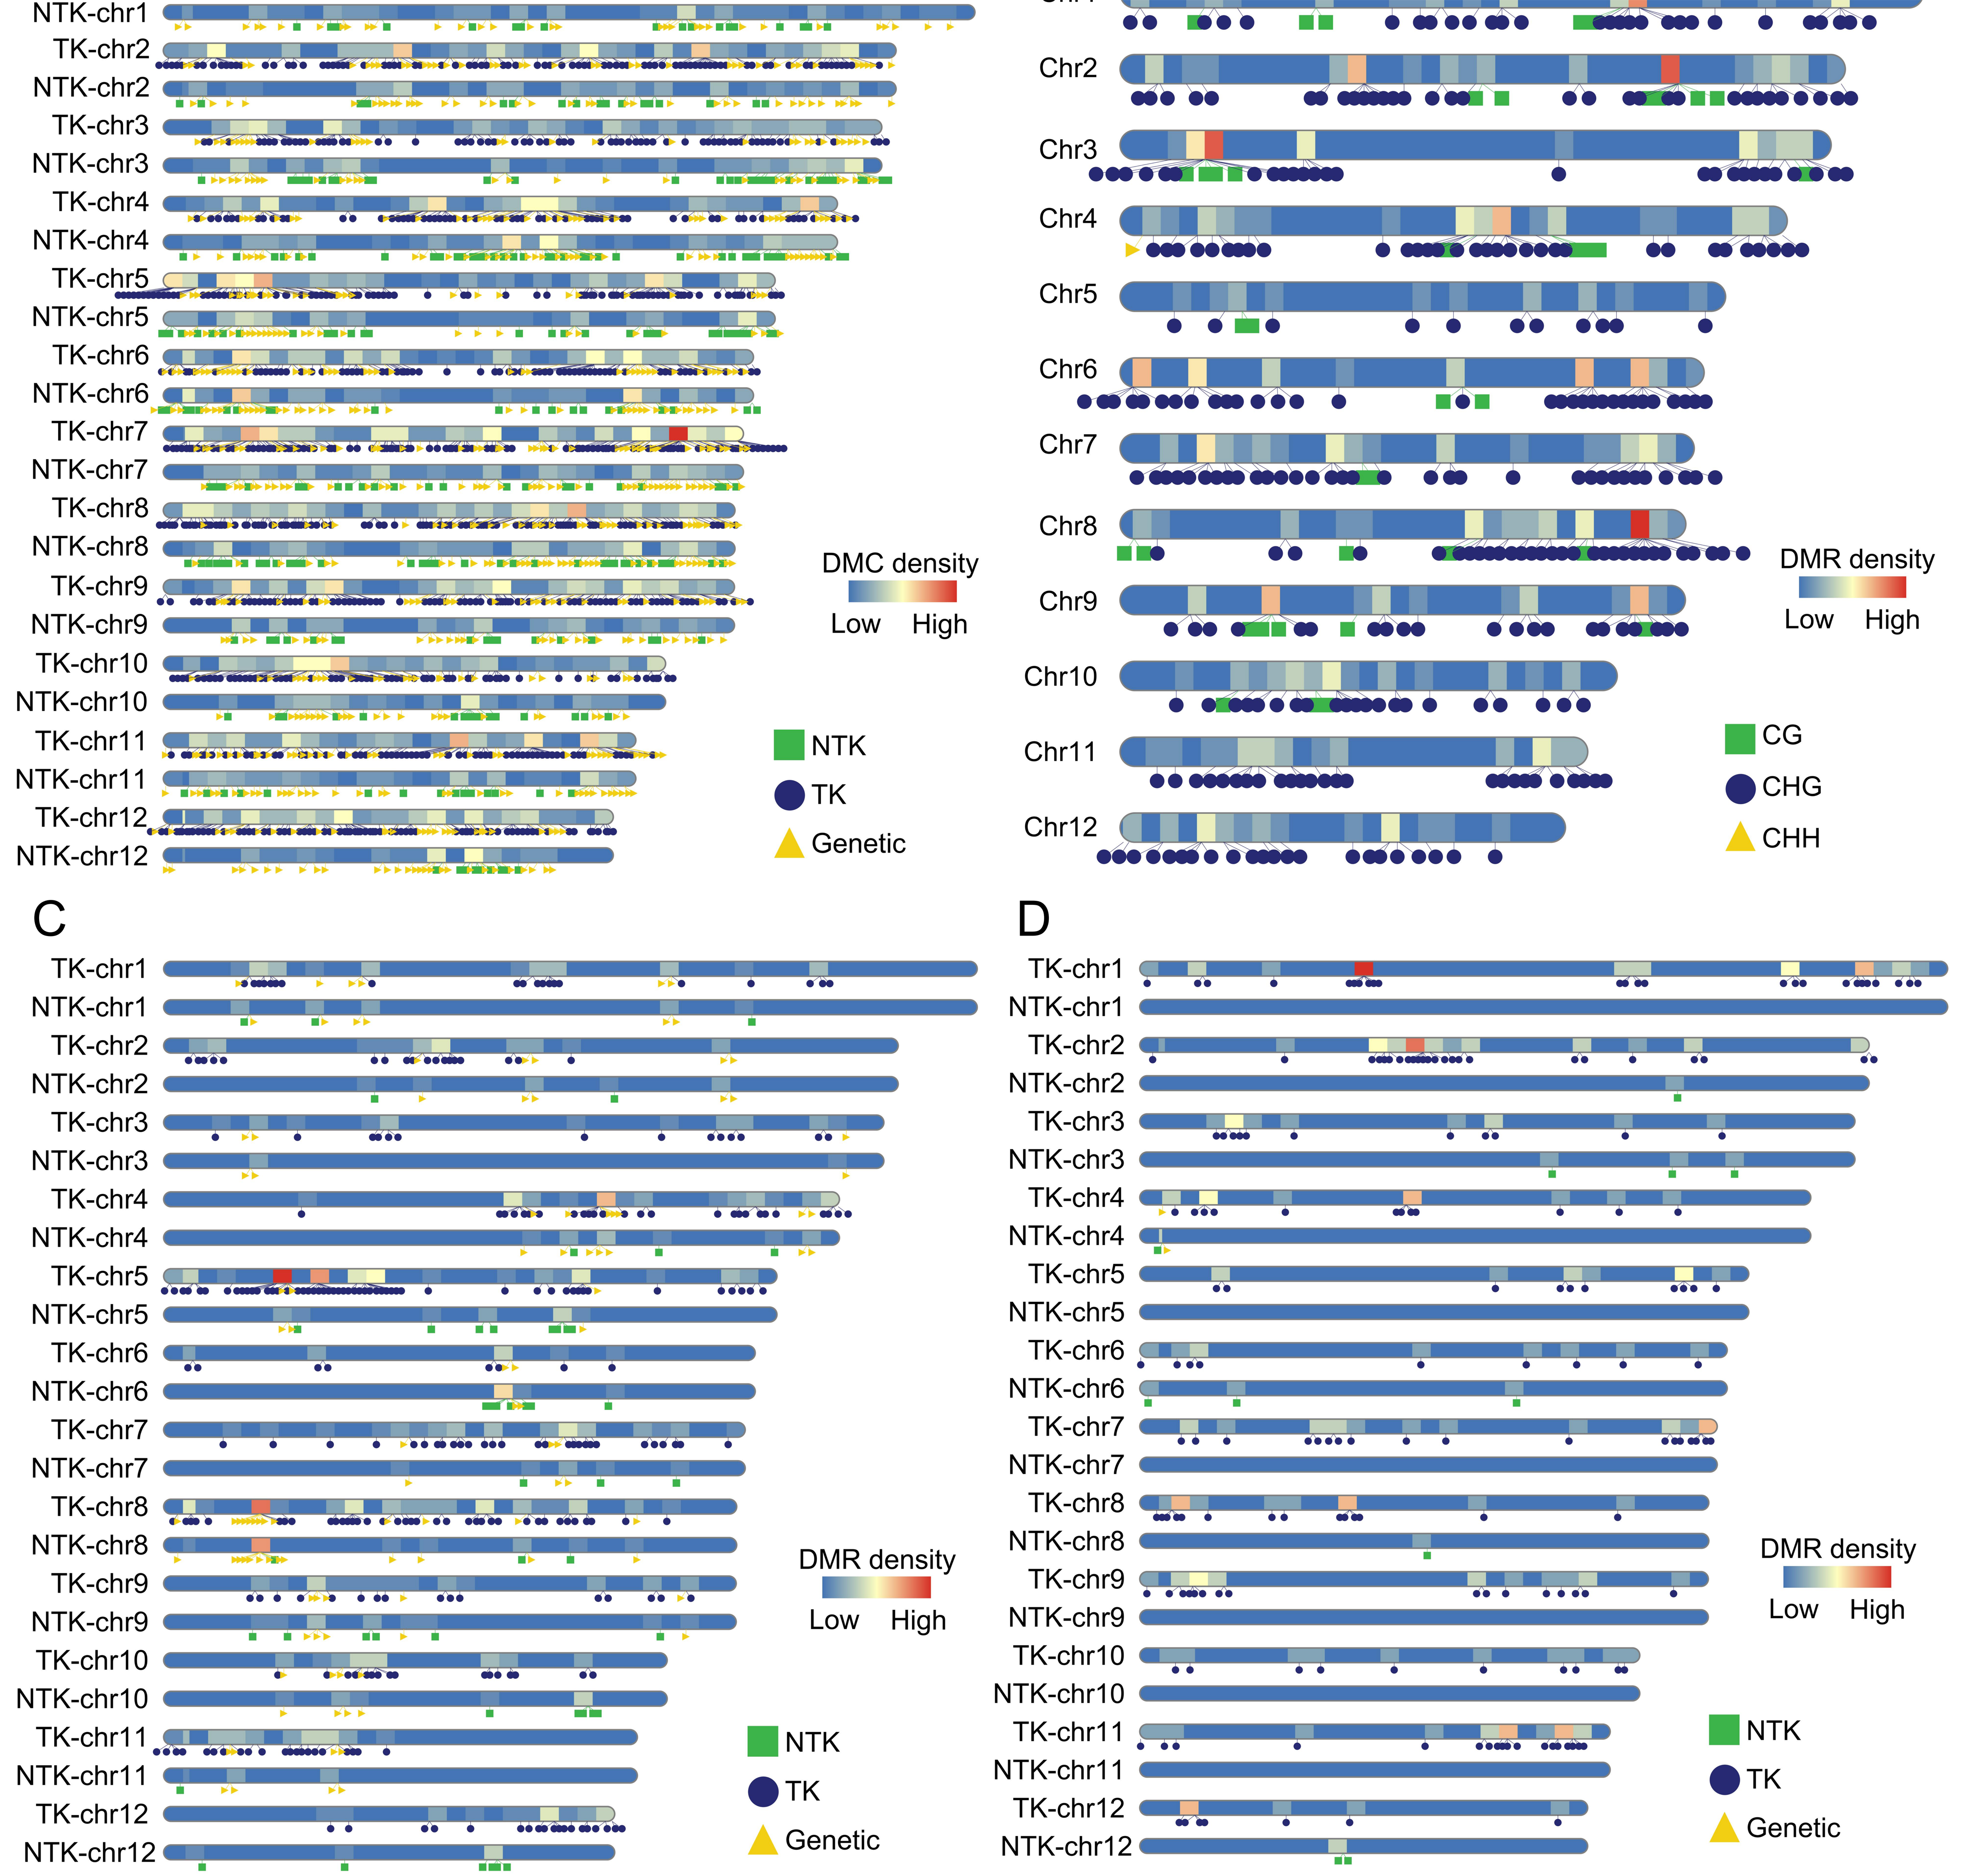


**Fig. S5** **Distribution of differentially methylated cytosines (DMCs) and differentially methylated regions (DMRs) on chromosomes.** **A** The distribution of genetic and nongenetic DMCs on chromosomes, where the colour represents the density of DMC. **B** The distribution of three types of DMRs on chromosomes, where the colour represents the density of DMR. **C** The distribution of genetic and nongenetic DMRs of CG type on chromosomes, where the colour represents the density of DMR. **D** The distribution of genetic and nongenetic DMRs of CHG type on chromosomes, where the colour represents the density of DMR.


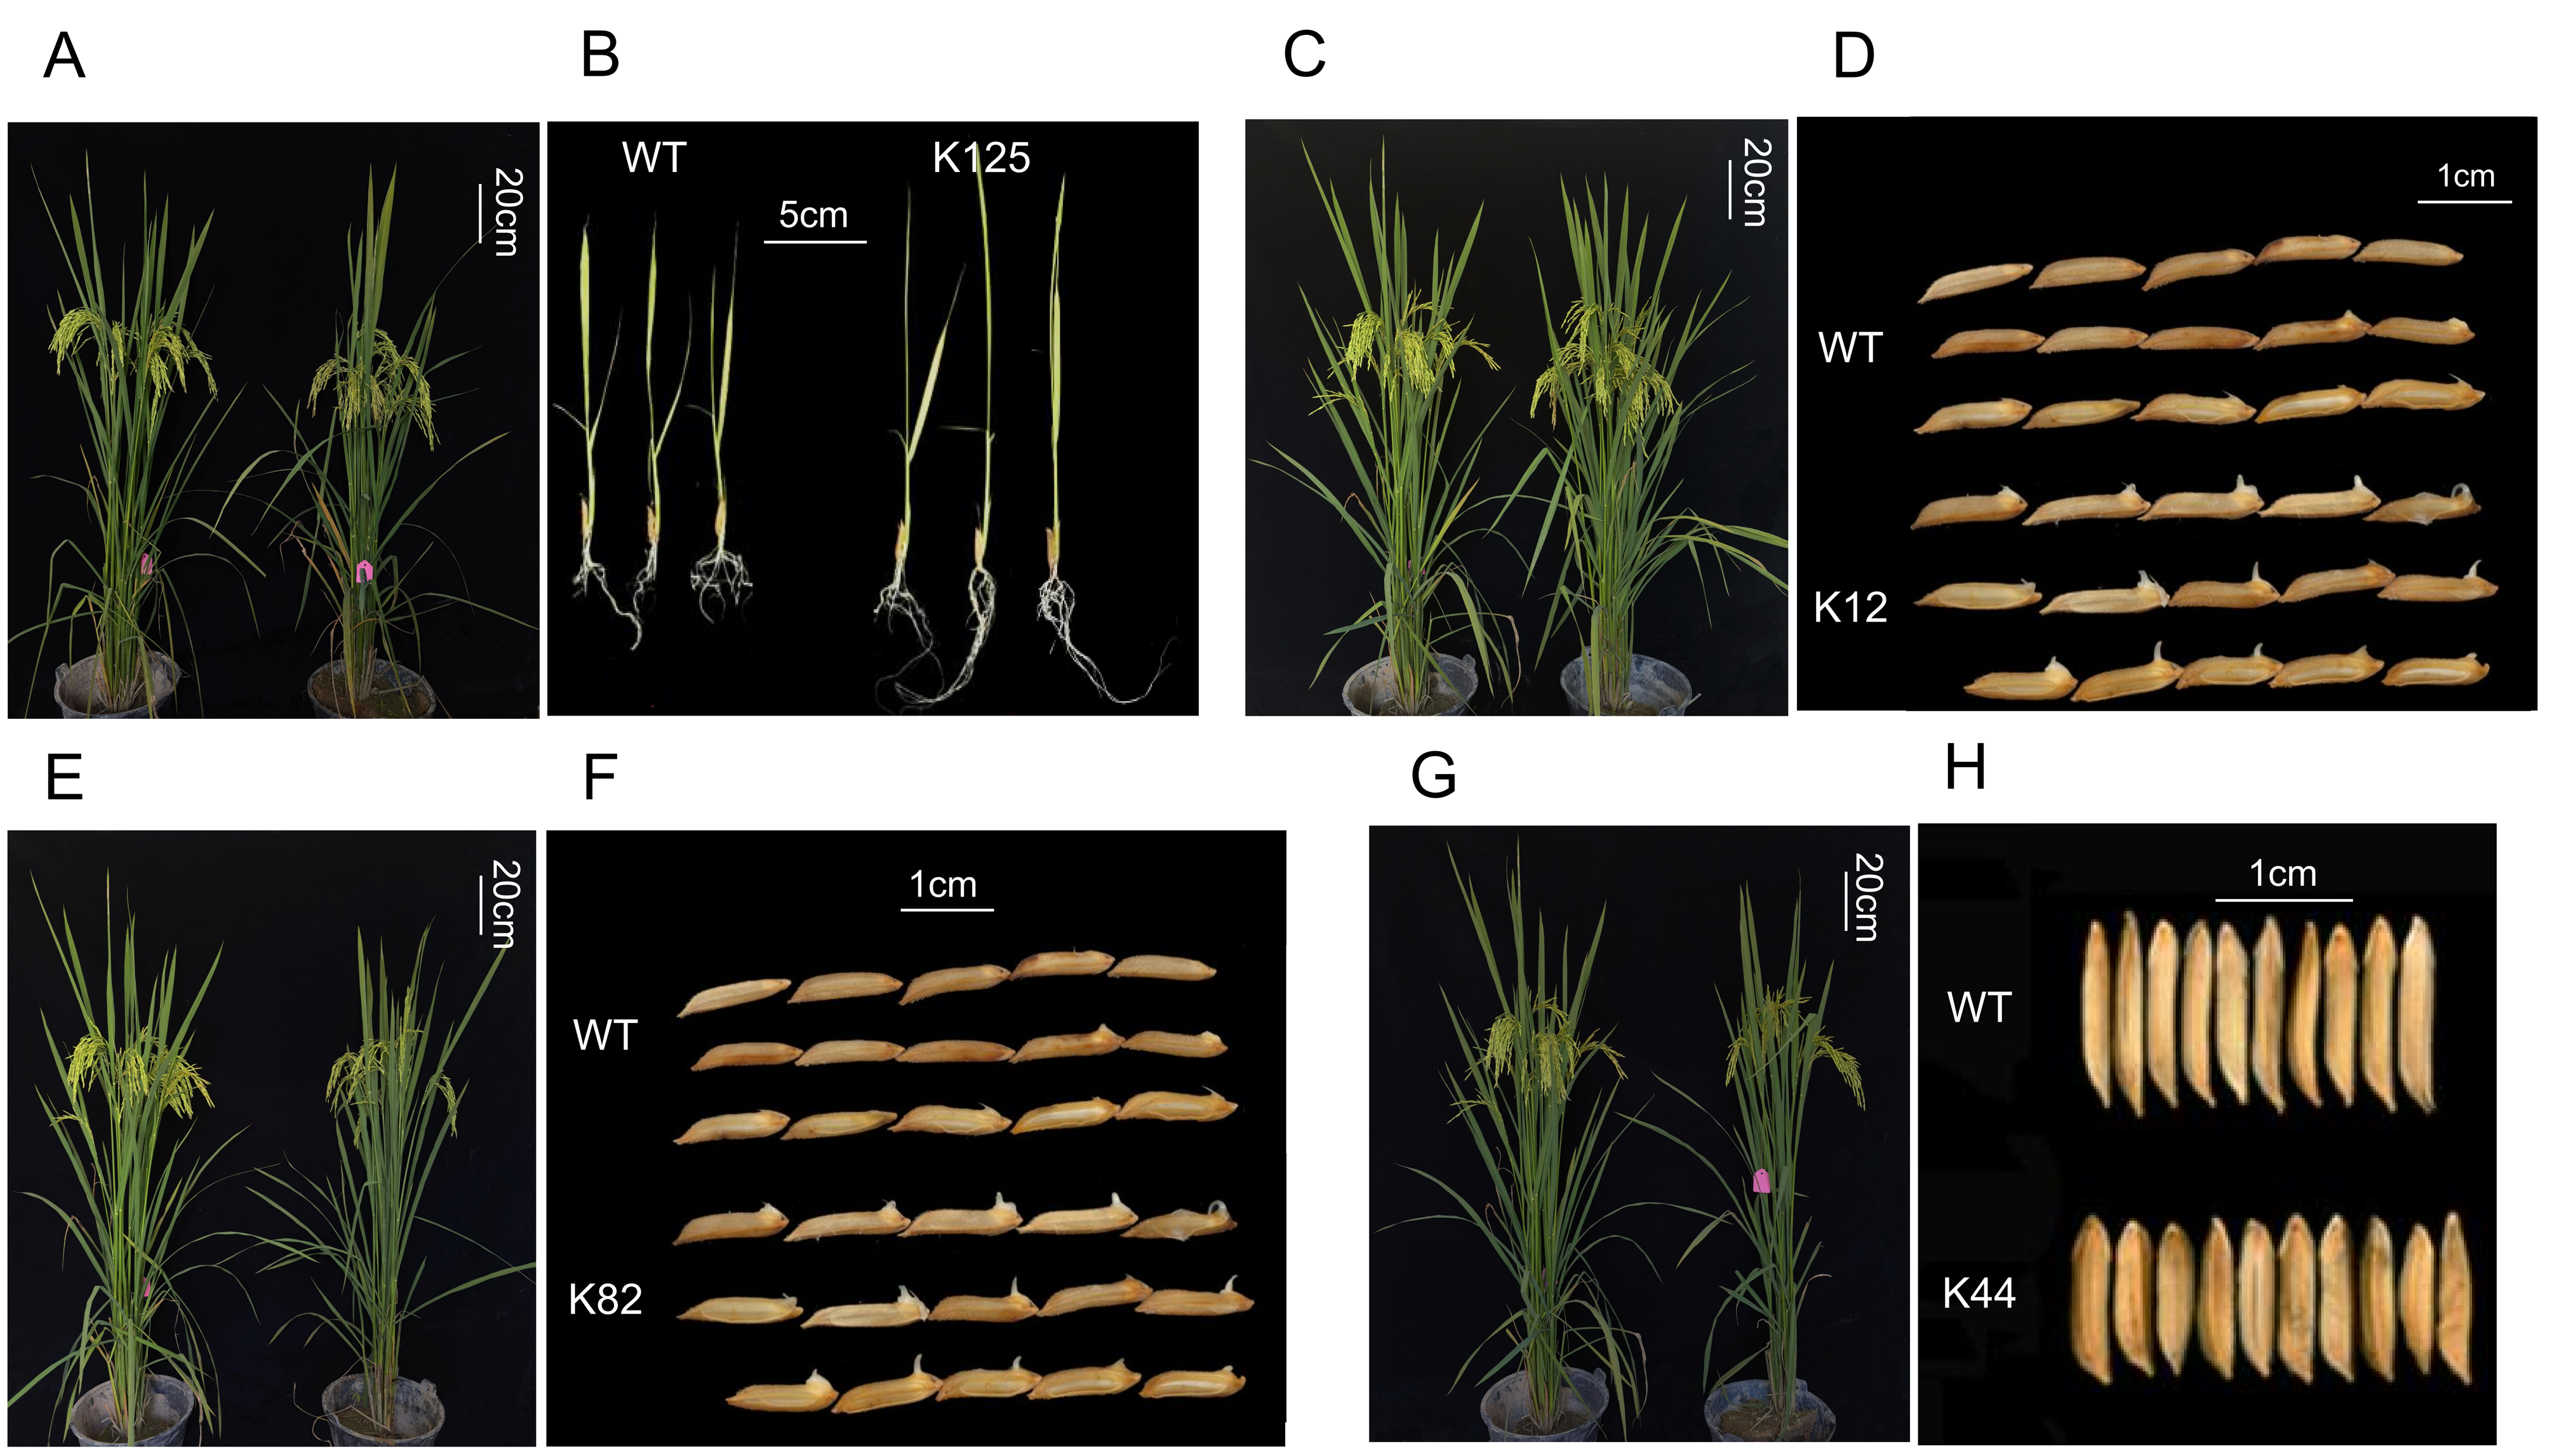


**Fig. S6** **Representative mutants.** **A** Nitrogen-efficient mutant K125. The vertical bar represents 20 cm. **B** Comparison of chlorate sensitivity between K125 and WT. The vertical bar represents 5 cm. **C** Drought-tolerant mutant K12. The vertical bar represents 20 cm. **D** Comparison of germination rates of K12 and WT under drought treatment. The vertical bar represents 1 cm. **E** Cold-tolerant mutant K82. The vertical bar represents 20 cm. **F** Comparison of germination rates between K82 and WT under cold treatment. The vertical bar represents 1 cm. **G** Grain-type mutant K44. **H** Comparison of grain type between K44 and WT. The vertical bar represents 1 cm.


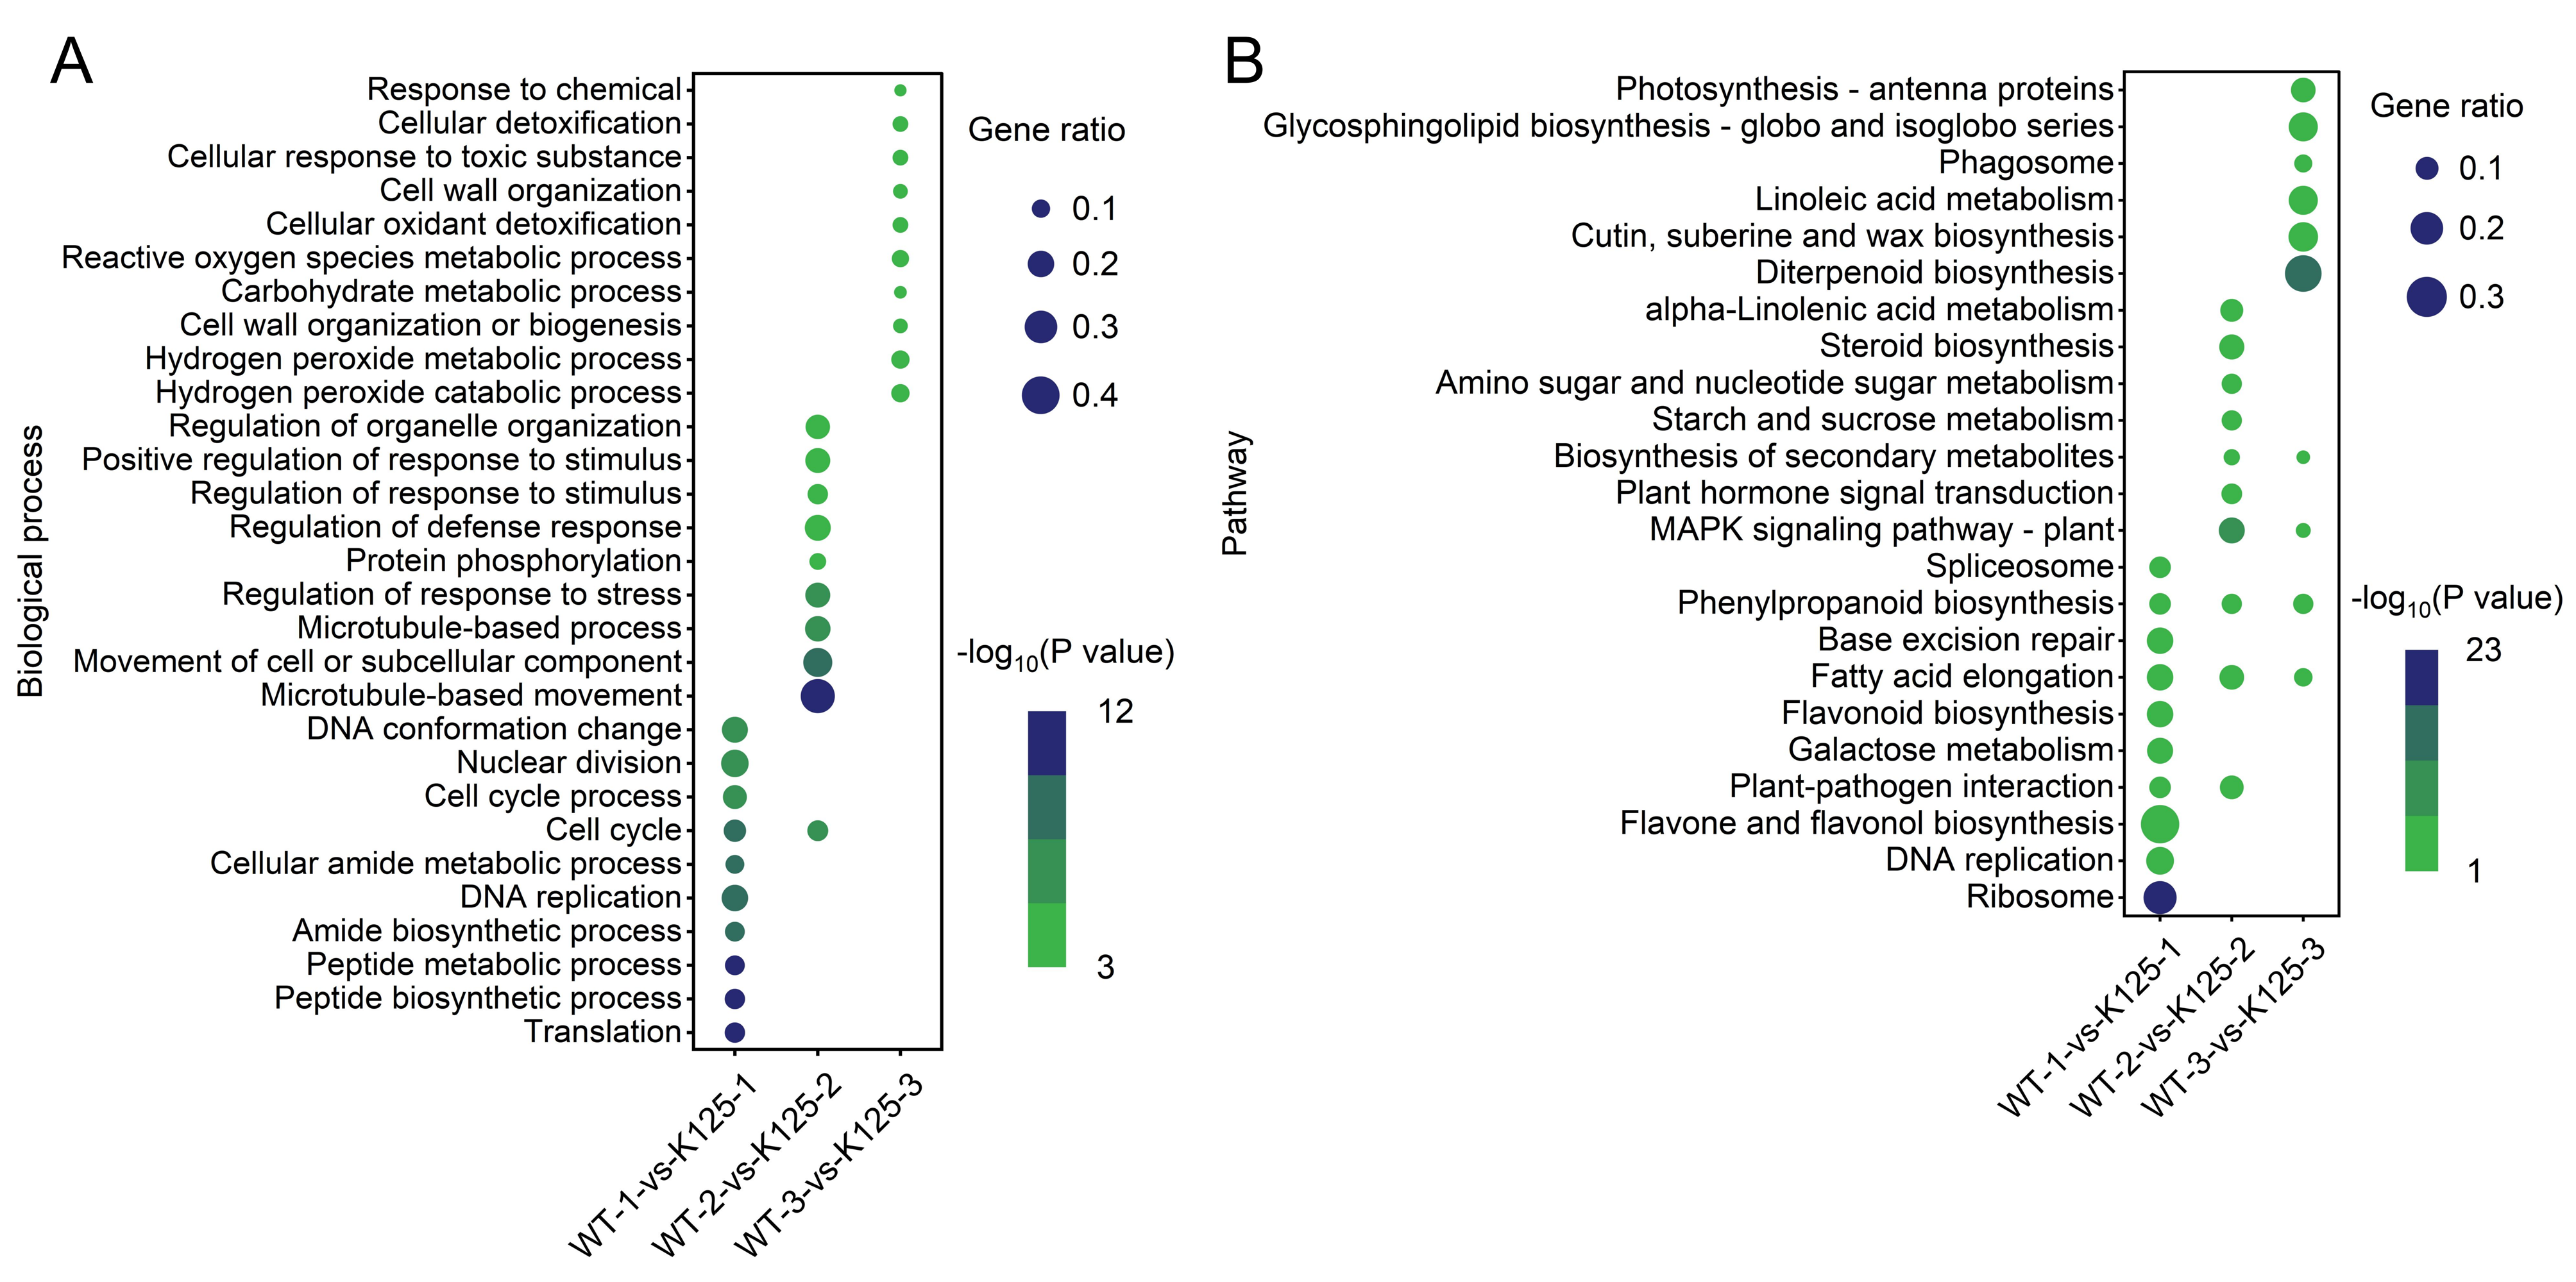


**Fig. S7** **Enrichment analysis of differentially expressed genes (DEGs) with different treatments at K125.** **A** GO enrichment of DEGs in different treatments, selecting the top 10 biological processes with significant differences, where the circle size represents the ratio of target genes enriched in the biological process to background genes enriched in the biological process, and the colour represents the significance level. **B** KEGG enrichment of DEGs in different treatments, selecting the top 10 pathways with significant differences, where the circle size represents the ratio of target genes enriched in the pathway to background genes enriched in the pathway, and the colour represents the significance level.


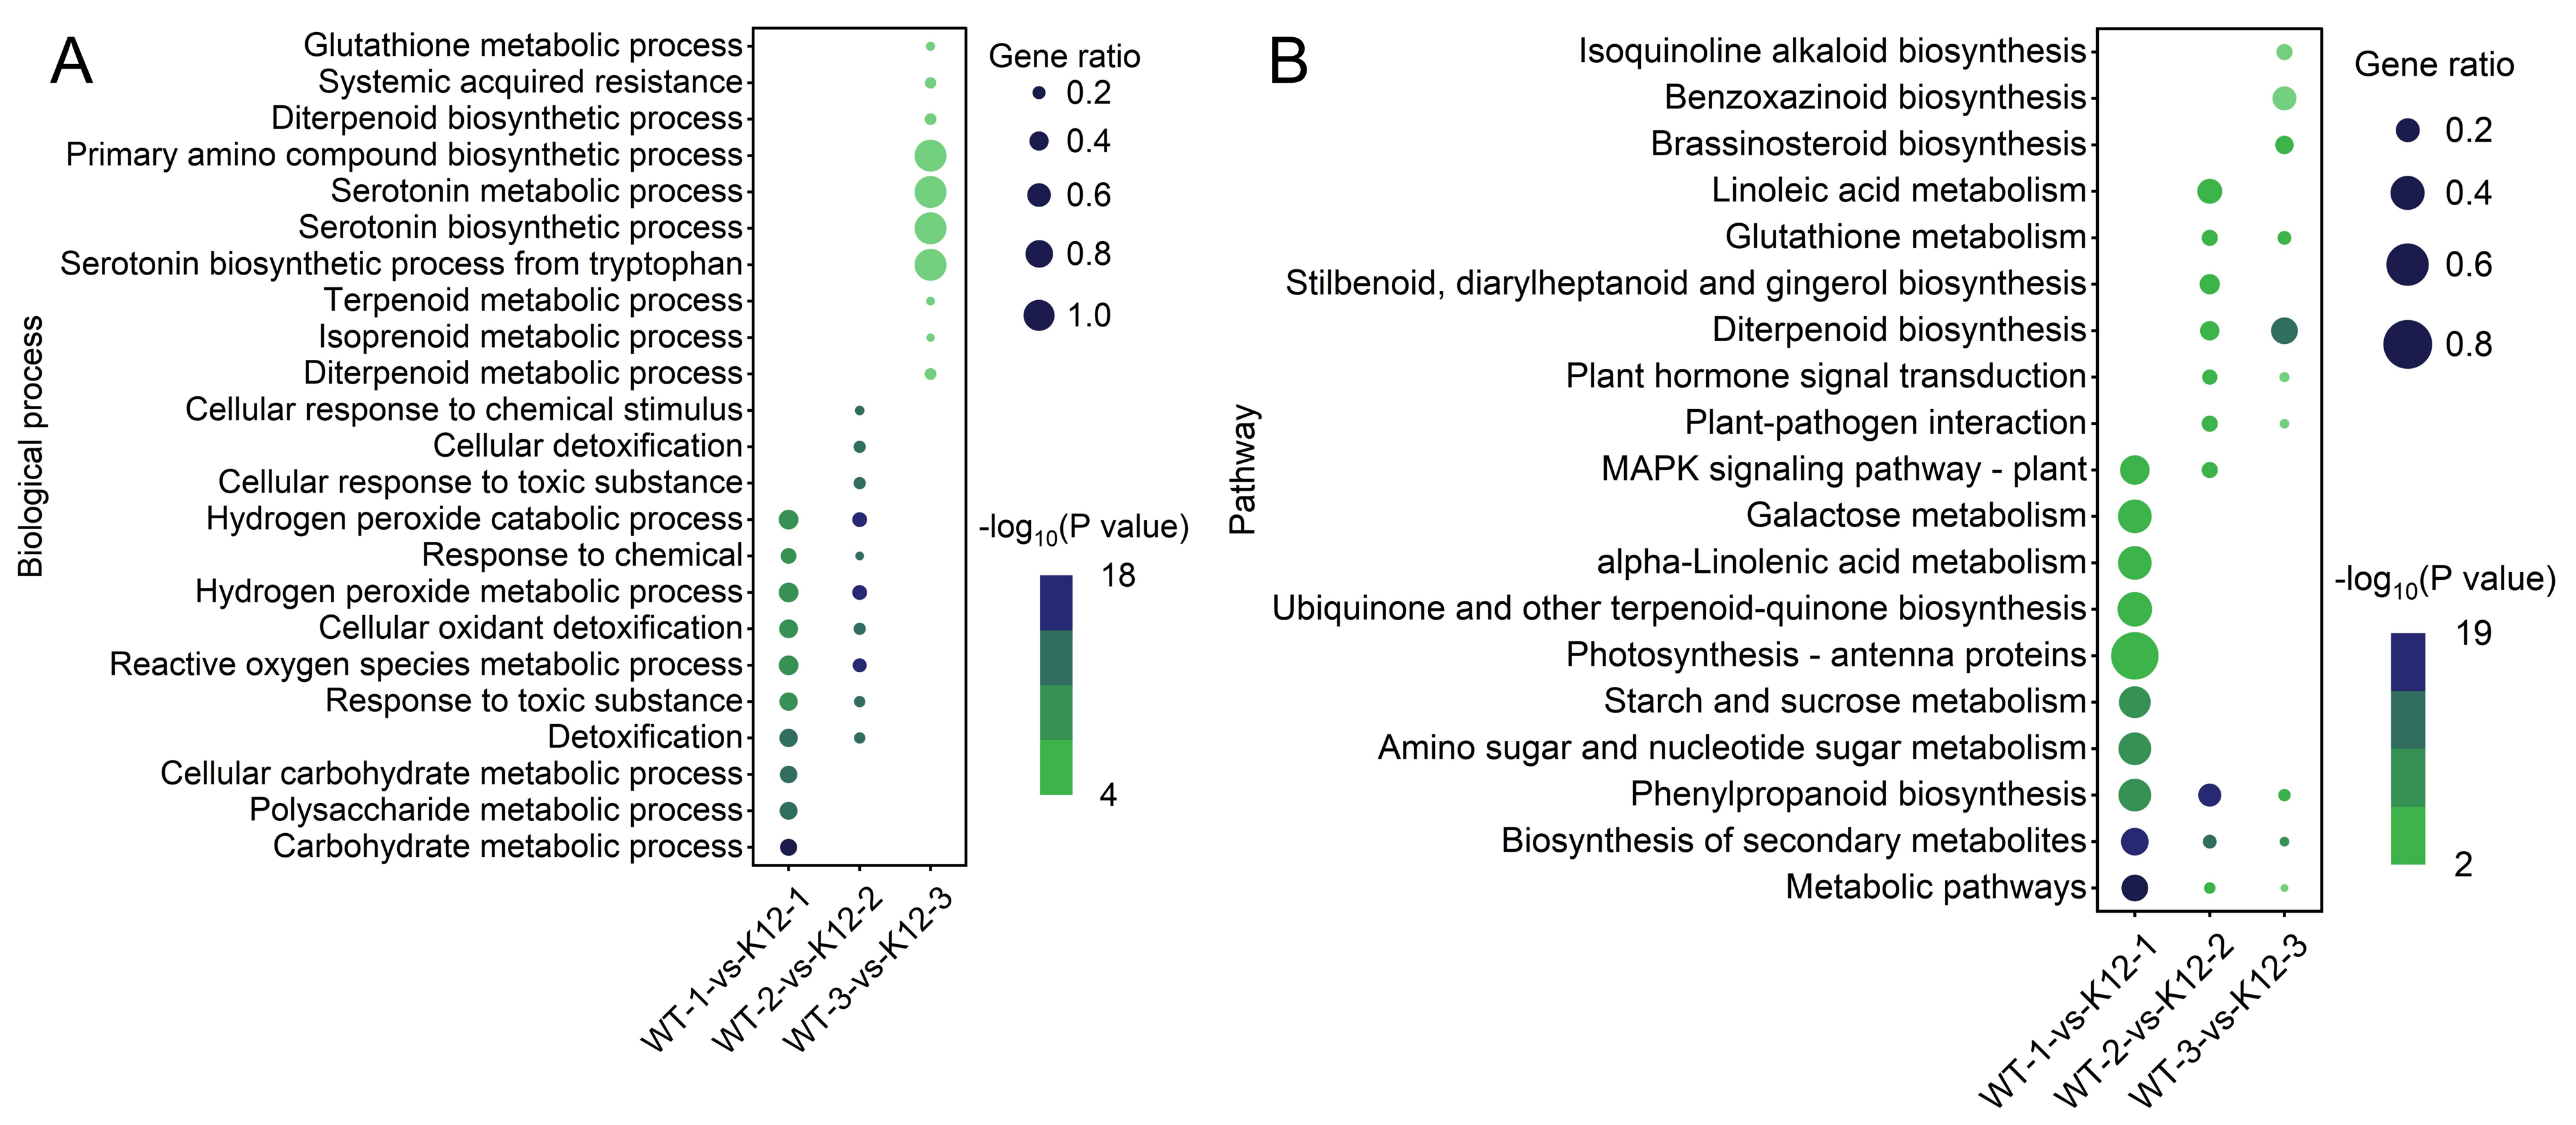


**Fig. S8** **Enrichment analysis of differentially expressed genes (DEGs) with different treatments at K12. A** GO enrichment of DEGs in different treatments, selecting the top 10 biological processes with significant differences, where the circle size represents the ratio of target genes enriched in the biological process to background genes enriched in the biological process, and the colour represents the significance level. **B** KEGG enrichment of DEGs in different treatments, selecting the top 10 pathways with significant differences, where the circle size represents the ratio of target genes enriched in the pathway to background genes enriched in the pathway, and the colour represents the significance level.


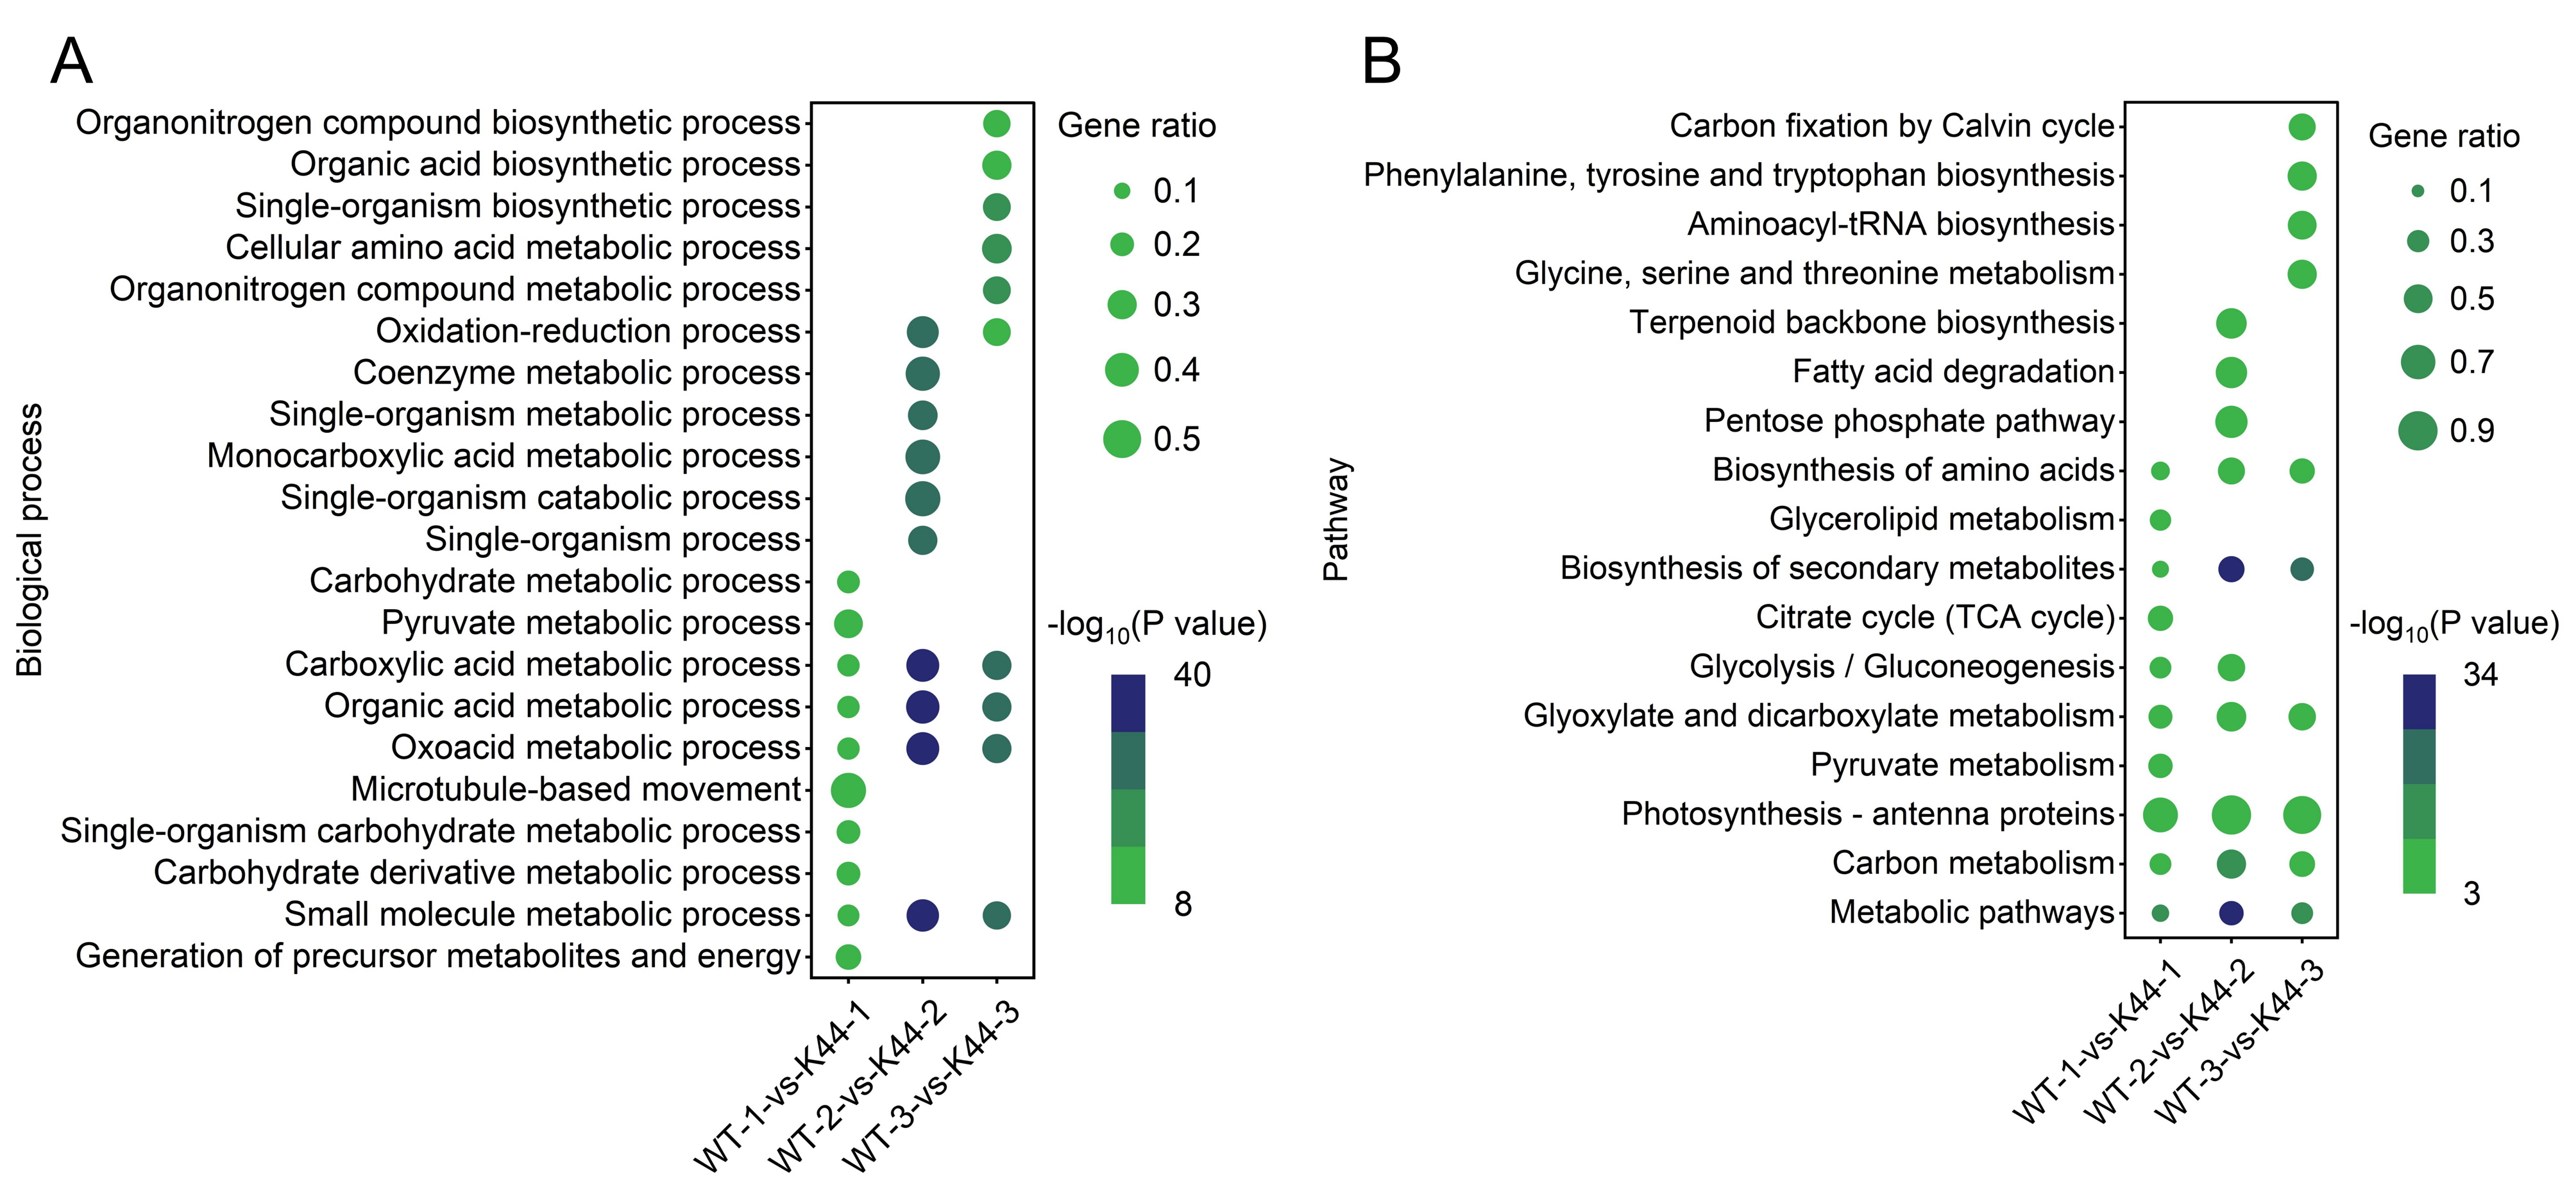


**Fig. S9** **Enrichment analysis of differentially expressed genes (DEGs) with different treatments at K44.** **A** GO enrichment of DEGs in different treatments, selecting the top 10 biological processes with significant differences, where the circle size represents the ratio of target genes enriched in the biological process to background genes enriched in the biological process, and the colour represents the significance level. **B** KEGG enrichment of DEGs in different treatments, selecting the top 10 pathways with significant differences, where the circle size represents the ratio of target genes enriched in the pathway to background genes enriched in the pathway, and the colour represents the significance level.


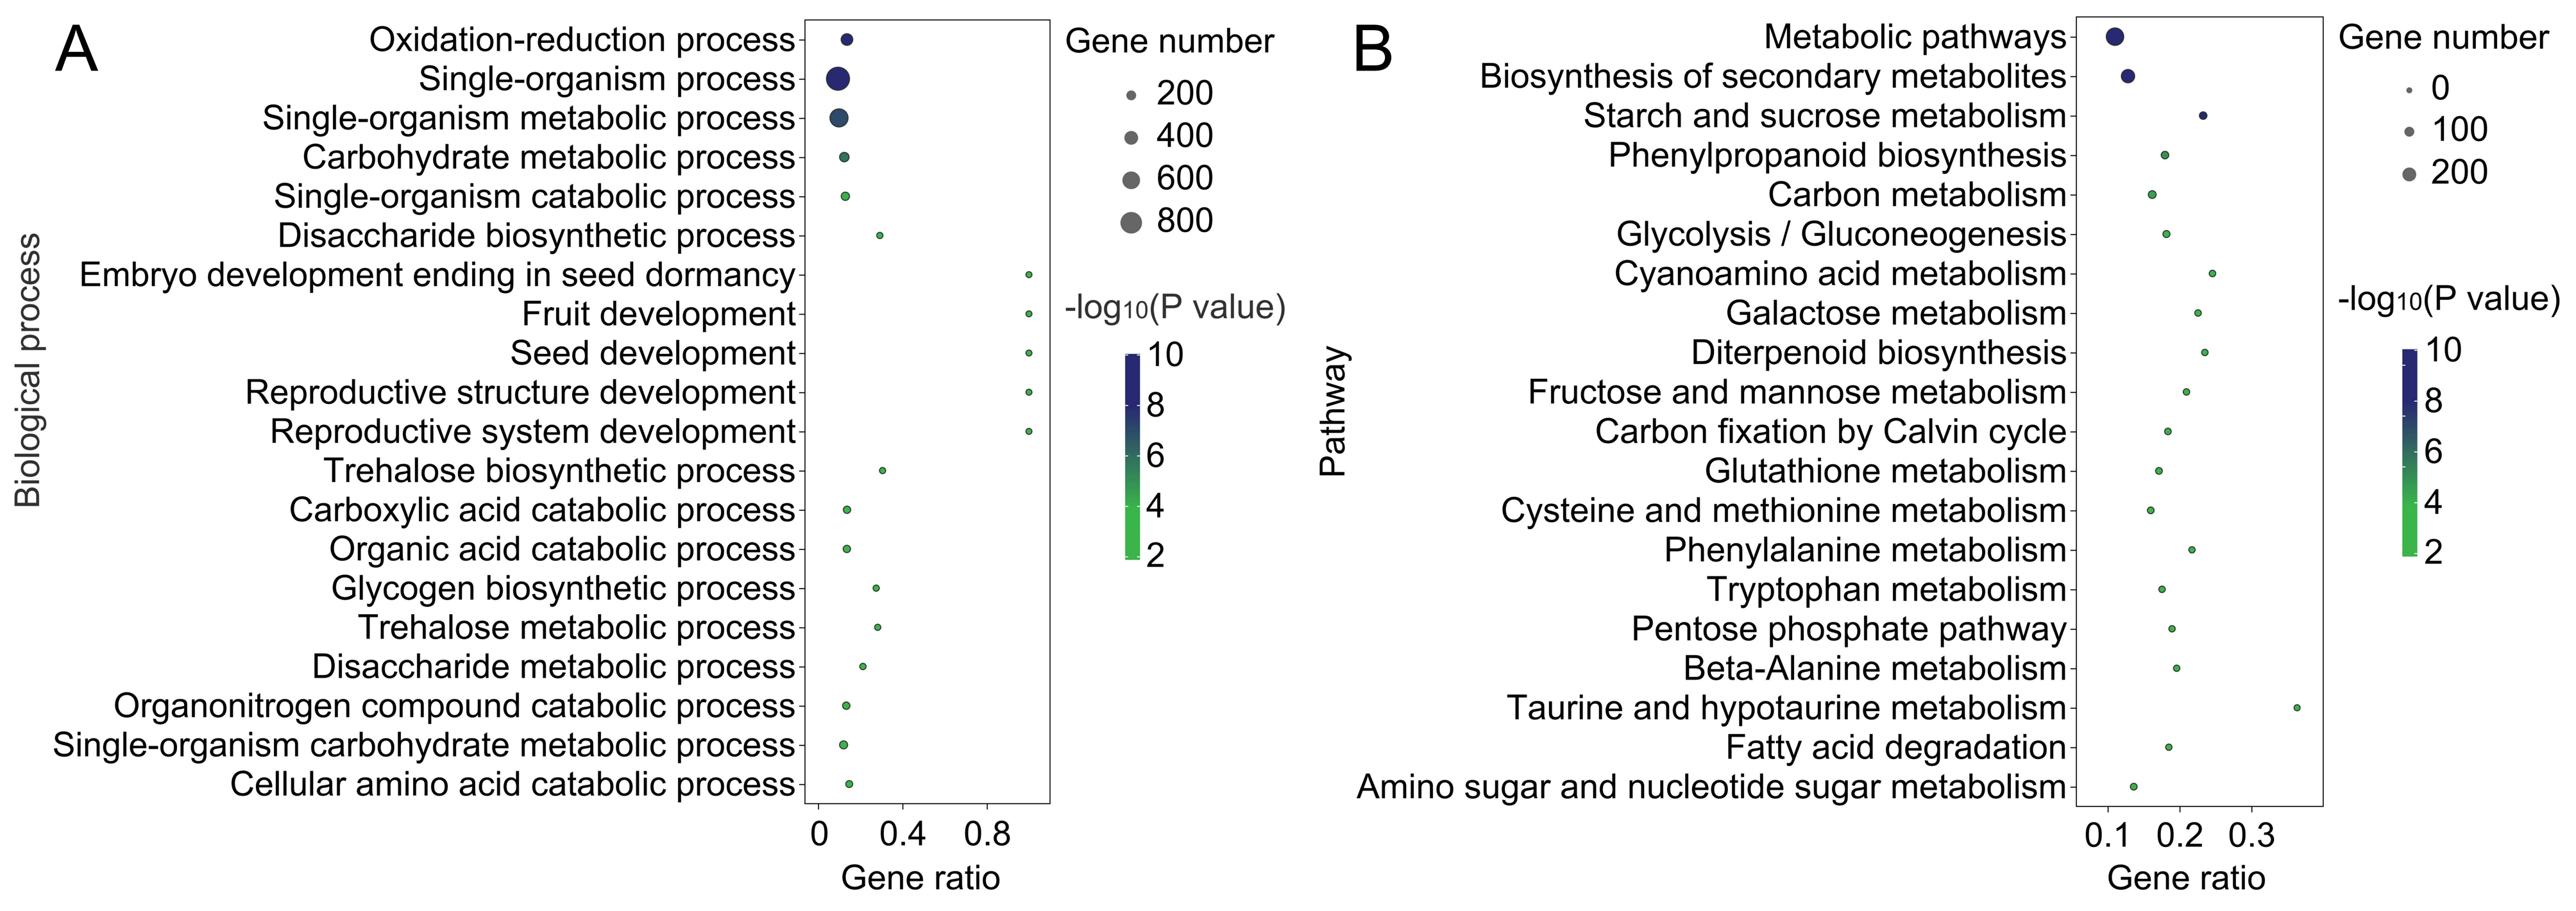


**Fig. S10** **Differentially expressed genes (DEGs) enrichment analysis of K82. A** GO enrichment of DEGs in different treatments, selecting the top 10 biological processes with significant differences, where the circle size represents the number of target genes enriched in the biological process, and the colour represents the significance level. **B** KEGG enrichment of DEGs in different treatments, selecting the top 10 pathways with significant differences, where the circle size represents the number of target genes enriched in the pathway, and the colour represents the significance level.


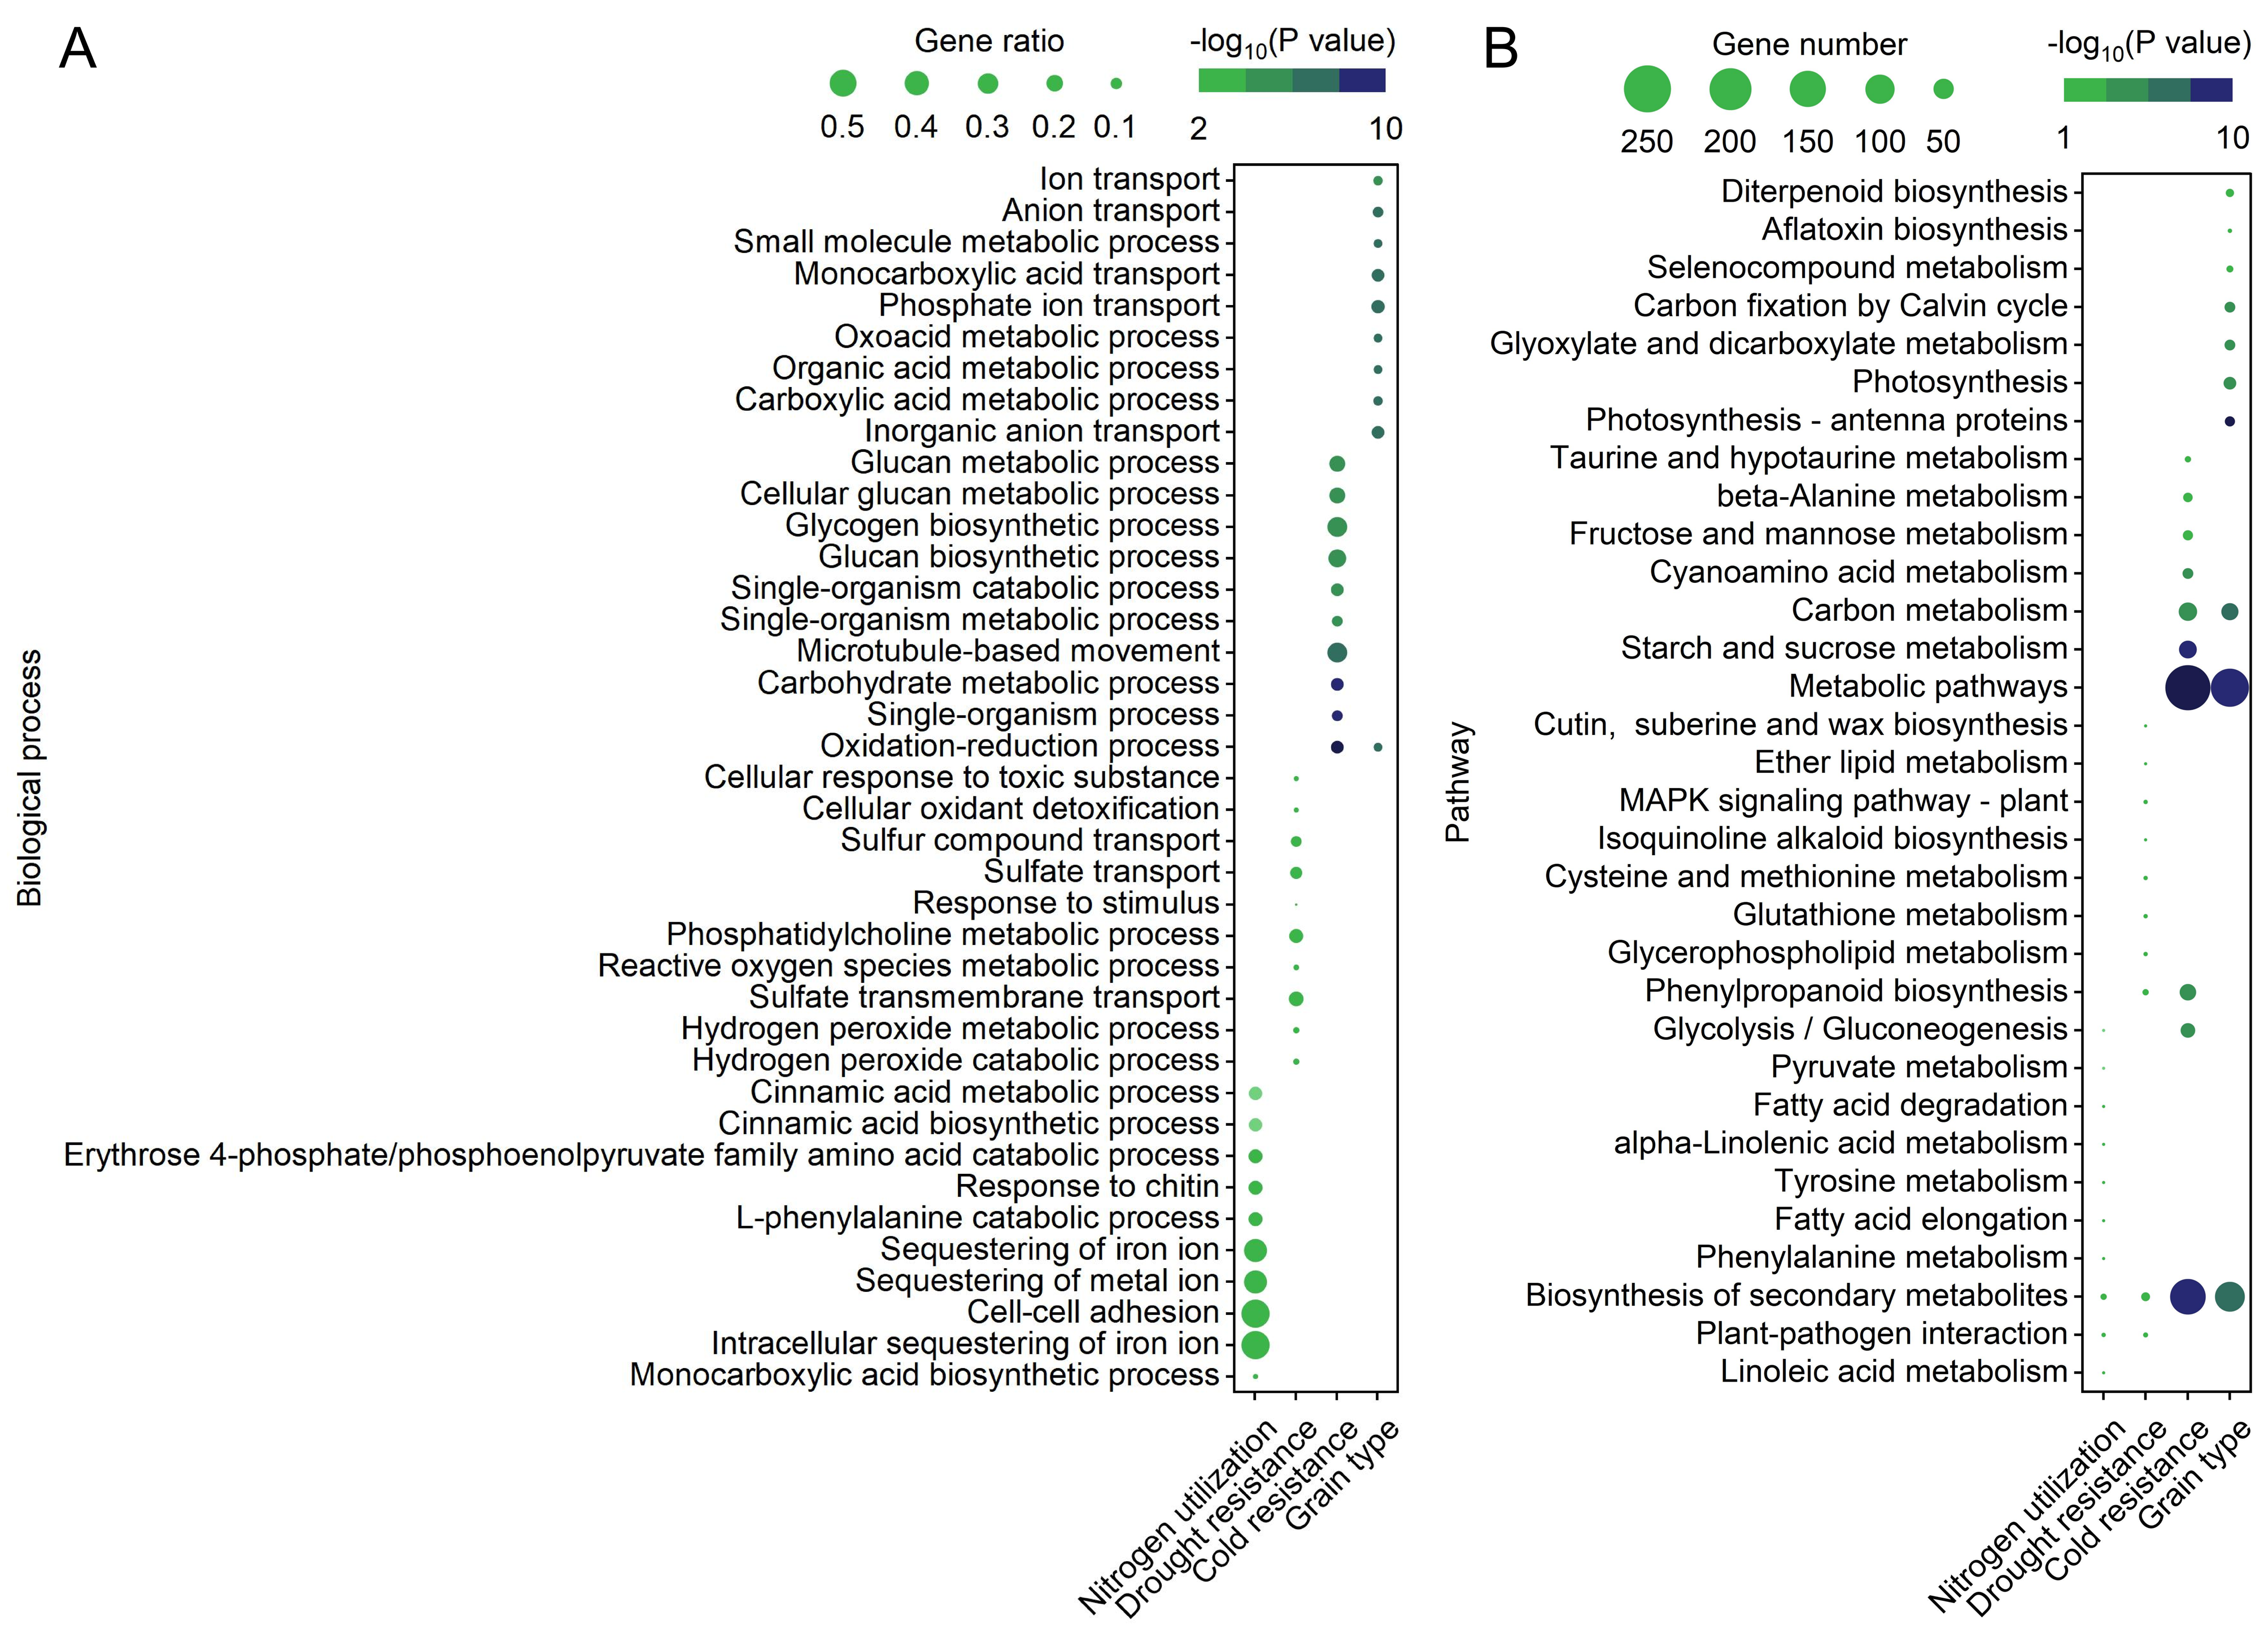


**Fig. S11** **GO and KEGG enrichment of intersecting genes.** **A** GO enrichment of differentially expressed genes (DEGs) in different treatments, selecting the top 10 biological processes with significant differences, where the circle size represents the ratio of target genes enriched in the biological process to background genes enriched in the biological process, and the colour represents the significance level. **B** KEGG enrichment of DEGs in different treatments, selecting the top 10 pathways with significant differences, where the circle size represents the number of target genes enriched in the pathway, and the colour represents the significance level.


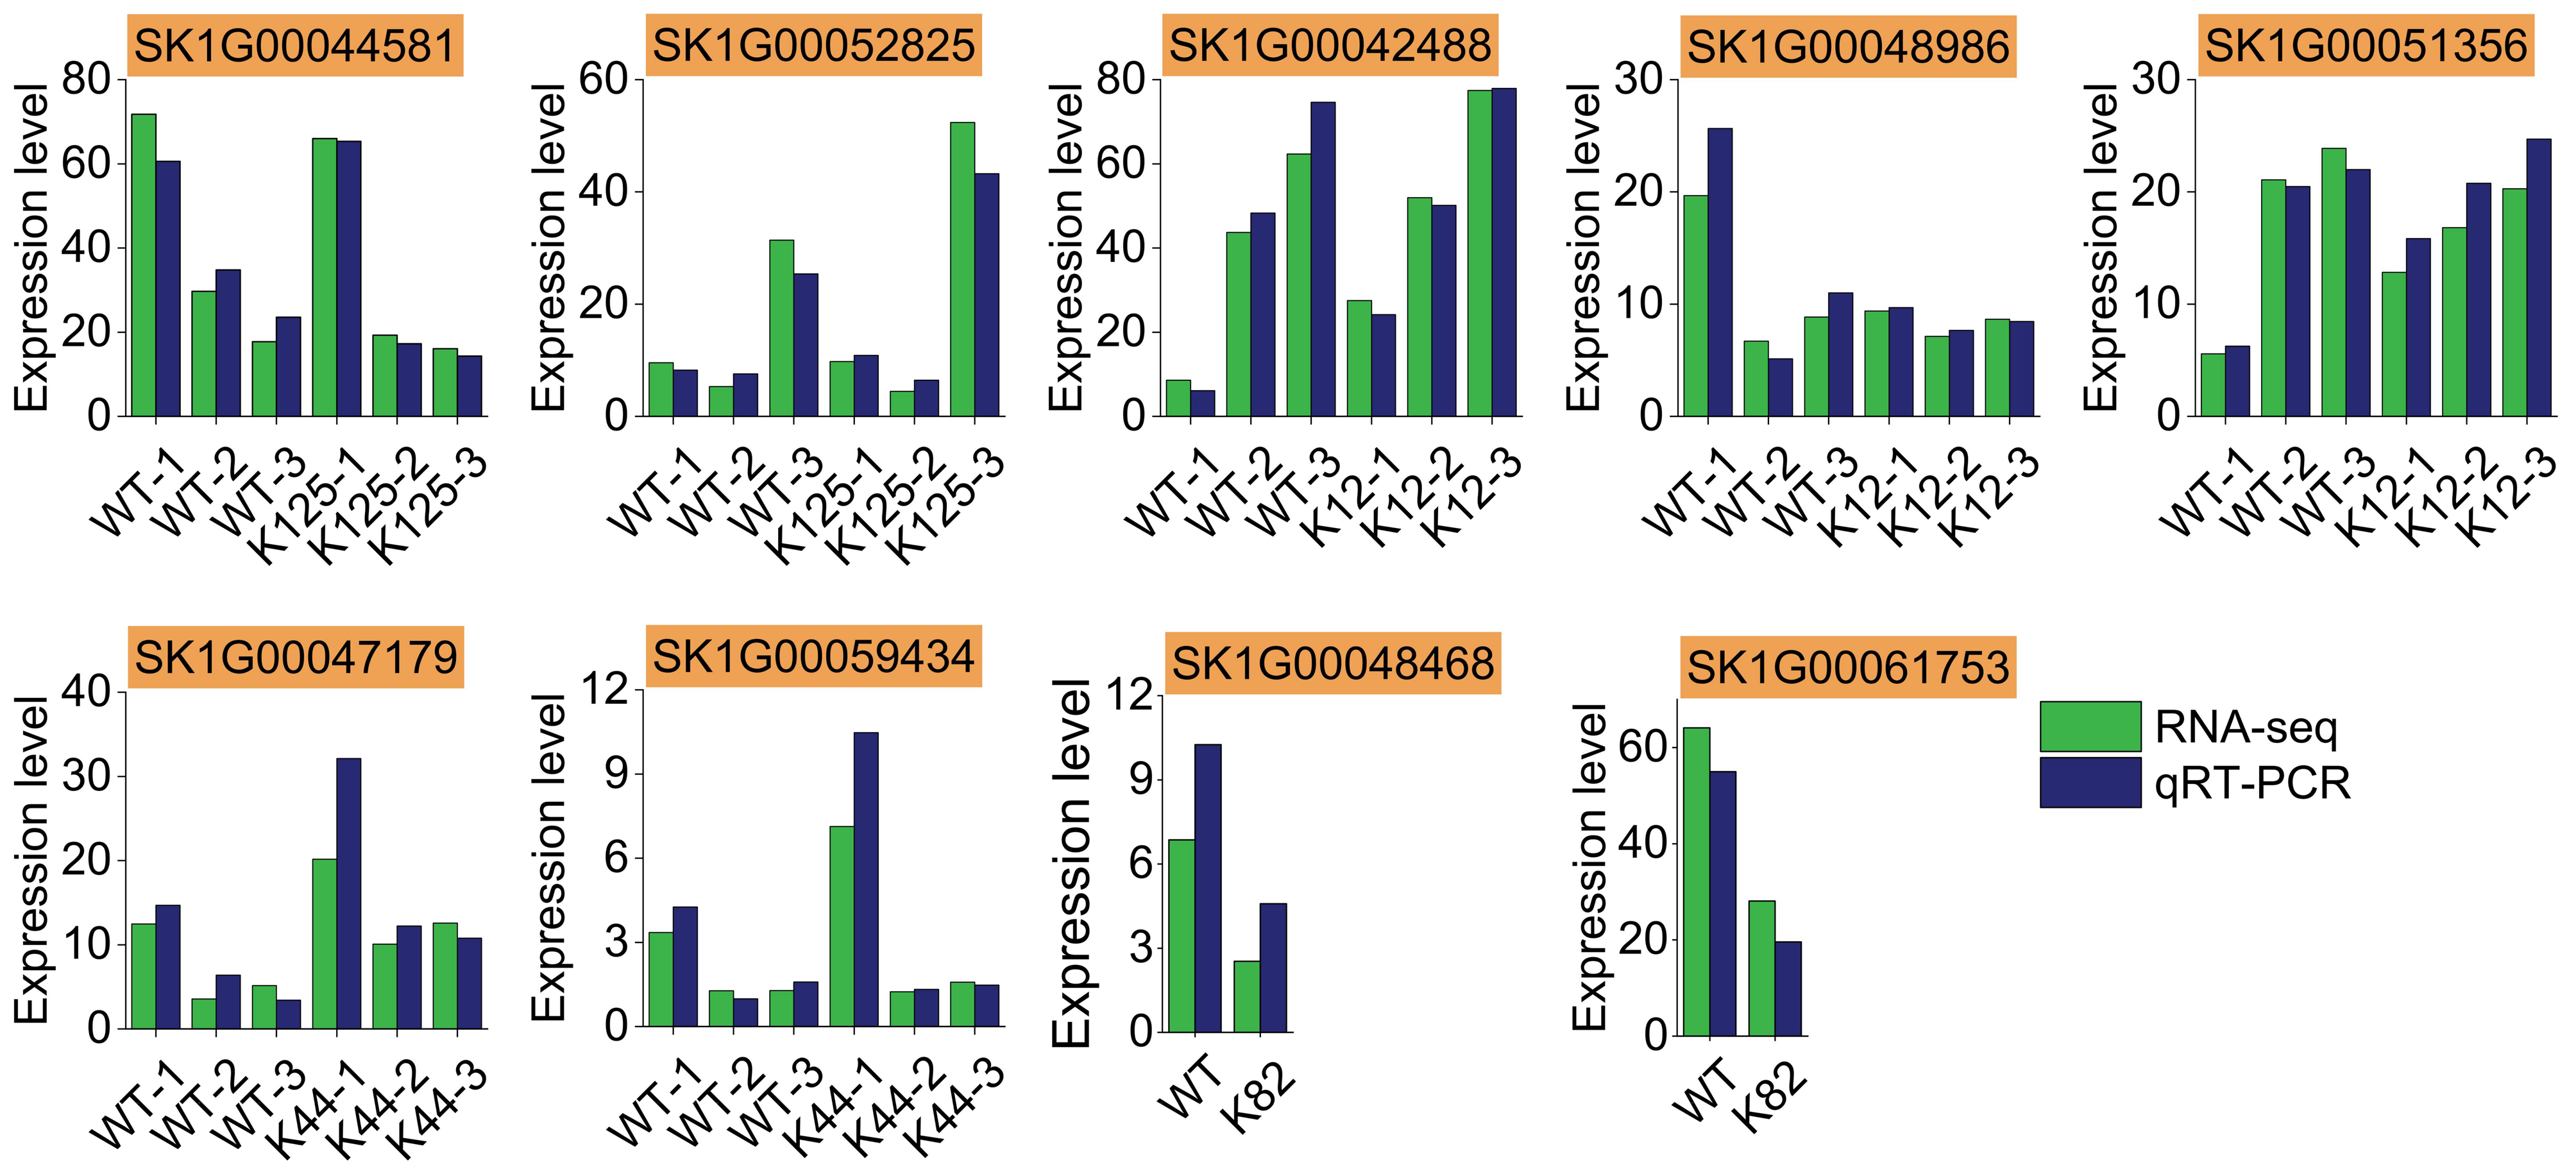


**Fig. S12** **Quantitative reverse transcription polymerase chain reaction (qRT-PCR) validation of 9 candidate genes.**
